# Supplementary material
Source: PubMed Central journal article supplement (PMC6927501)
Supplement: ehp-127-117007-s001.pdf [file ehp-127-117007-s001.pdf]

**Note to readers with disabilities:** *EHP* strives to ensure that all journal content is accessible to all readers. However, some figures and Supplemental Material published in *EHP* articles may not conform to [508 standards](#) due to the complexity of the information being presented. If you need assistance accessing journal content, please contact [ehp508@niehs.nih.gov](mailto:ehp508@niehs.nih.gov). Our staff will work with you to assess and meet your accessibility needs within 3 working days.

### **Supplemental Material**

#### **Suicide and Ambient Temperature: A Multi-Country Multi-City Study**

Yoonhee Kim, Ho Kim, Antonio Gasparrini, Ben Armstrong, Yasushi Honda, Yeonseung Chung, Chris Fook Sheng Ng, Aurelio Tobias, Carmen Íñiguez, Eric Lavigne, Francesco Sera, Ana M. Vicedo-Cabrera, Martina S. Ragetti, Noah Scovronick, Fiorella Acquaotta, Bing-Yu Chen, Yue-Liang Leon Guo, Xerxes Seposo, Tran Ngoc Dang, Micheline de Sousa Zanotti Stagliorio Coelho, Paulo Hilario Nascimento Saldiva, Anna Kosheleva, Antonella Zanobetti, Joel Schwartz, Michelle L. Bell, and Masahiro Hashizume

#### **Table of Contents**

##### **Data collection**

**Table S1.** Summary statistics of other weather variables and additional information by country.

**Table S2.** Location-specific total number of suicide, average temperature (°C), maximum suicide temperature (°C) (MaxST) and lag-cumulative relative risk (RR) for the MaxST vs. MinST, estimated by using a conditional Poisson model adjusting for seasonality, long-term time trend, and the day-of-week from the first-stage modeling.

**Table S3.** P-values of the LRT (log-likelihood ratio test) between linear and nonlinear models with different number of internal knots of the distributed lag nonlinear function for temperature.

**Table S4.** Random-effects meta-regression models in the second-stage analysis.

**Table S5.** Country-specific minimum suicide temperature (°C) (MinST) and maximum suicide temperature (°C) (MaxST) and pooled lag-cumulative relative risks (RRs) with 95% confidence intervals (CIs) by country in subgroup analyses by sex and age groups (young, < 65 years of age; elder, ≥ 65 years of age) using a conditional Poisson model adjusting for seasonality, long-term time trend, and the day-of-week.

**Figure S1.** Quasi-Akaike Information Criteria (AIC modified with overdispersion) between linear and nonlinear models using a quadratic B-spline with one to three internal knots for the temperature-suicide association (A) pooled across all locations, locations in western countries (Brazil, Canada, South Africa, Spain, Switzerland, UK, and US), and locations in eastern countries (Japan, South Korea, Philippines, Taiwan, and Vietnam), (B) pooled for each country, and (C) in capital cities/regions where the number of suicides was largest for each country. BR, Brazil; CA, Canada; JP, Japan; KR, South Korea; PH, the Philippines; SA, South Africa; SP, Spain; SW, Switzerland; TW, Taiwan; UK, the UK; US, the United States; VN, Vietnam.

**Figure S2.** Country-specific lag-response associations for maximum suicide temperature (MaxST) vs. minimum suicide temperature (MinST) over the extended lags of up to 6 days (with 95% confidence interval, shaded grey) using a conditional Poisson model adjusting for seasonality, long-term time trend, and the day-of-week. RR, relative risk.

**Figure S3.** Location-specific lag-cumulative temperature-suicide associations as the best linear unbiased prediction (BLUP) (with 95% CIs, shaded grey) and the corresponding temperature distributions. The temperature-suicide associations were estimated by using a conditional Poisson model adjusting for seasonality, long-term time trend, and the day of week. The blue and red vertical dotted lines indicate the minimum suicide temperature and maximum suicide temperature, respectively. CI, confidence interval; RR, relative risk.

**Figure S4.** Country-specific pooled lag-response associations for the maximum suicide temperature (MaxST) vs. the minimum suicide temperature (MinST) with the 95% confidence intervals (vertical bars) using a conditional Poisson model adjusting for seasonality, long-term time trend, and the day of week. RR, relative risk.

**Figure S5.** Distributions of the location-specific (A) minimum suicide temperature (°C) (MinST) and (B) maximum suicide temperature (°C) (MaxST) against summer average temperature (°C) by country. Larger symbols indicate the country-specific median values of the MinST and MaxST against the average of the summer temperature by country. The summer temperature was defined as the average of daily ambient temperature during June to September in the countries in Northern Hemisphere and during December to March in the countries in Southern Hemisphere.

**Figure S6.** Country-specific and location-specific lag-cumulative temperature-suicide associations for maximum suicide temperature (MaxST) vs. minimum suicide temperature (MinST) using a conditional Poisson model adjusting for seasonality, long-term time trend, and the day of week. Larger symbols indicate the country-specific pooled estimates, and the location-specific estimates were derived from the first-stage modeling. The grey lines indicate the 95% confidence intervals. RR, relative risk.

**Figure S7.** Pooled lag-cumulative relative risks (RRs) with 95% CIs (vertical bars) by country in sensitivity analyses. The main model (Main) included a quadratic B-spline with three internal knots for the temperature-suicide association over the lag of 0–2 d. A linear distributed lag model (Linear) included the same lag of 0–2 d and estimated the RR between the 1st and the 99th percentiles of mean temperature. Different parameterizations for the temperature-suicide association were applied by including one internal knot at 50th percentile (1 knot), two internal knots at 33rd and 66th percentiles (2 knot), and a cubic B-spline at the same three internal knots (Cubic). The maximum lag was extended up to 6 d (Lag6). Additional covariates such as the averages of relative humidity (Humidity) and sunshine duration (Sunshine) over the current day and a day before, respectively, were adjusted in a subset of data. The temperature-suicide associations were estimated using a conditional Poisson model adjusting for seasonality, long-term time trend, and the day of week. CI, confidence intervals.

## References

## **Data collection**

### **Brazil**

We collected data from 15 cities from 1 January 1997 to 31 December 2005 and excluded two cities (Belem with no suicide since 2002 and Rio de Janeiro with no temperature data before 2002). A total of 13 cities were included in our study (see the full list in Table S2). Daily suicide counts were obtained from the Ministry of Health, Brazil. Daily mean temperature and relative humidity were obtained from the National Institute of Meteorology of Brazil. The missing rates for the daily series of temperature ranged 0.0%–8.6% (0.0%–10.4% after removing stratum without suicide) across the cities.

### **Canada**

We collected data from 26 cities (see the full list in Table S2) from 1 January 1986 to 31 December 1999. Daily suicide counts were obtained from Statistics Canada. Daily mean temperature and relative humidity were obtained from Environment Canada. The missing rates for the daily series of temperature ranged 0.0%–2.4% (0.0%–3.2% after removing stratum without suicide) across the cities.

### **Japan**

We collected data from 47 prefectures (see the full list in Table S2) from 1 January 1973 to 31 December 2012. Daily suicide counts were obtained from the Ministry of Health, Labour and Welfare, Japan. Daily mean temperature and relative humidity and the daily total of sunshine duration were obtained from the Japan Meteorological Agency. The missing rates for the daily series of temperature ranged 0.0%–0.1% (0.0%–0.1% after removing stratum without suicide) across the prefectures.

### **Korea (South)**

We collected data from 6 cities (see the full list in Table S2) from 1 January 1992 to 31 December 2013. Daily suicide counts were obtained from Statistics Korea, Ministry of Strategy and Finance in South Korea. Daily mean temperature and relative humidity and the daily total of sunshine duration were obtained from the Korea Meteorological Administration. The missing rates for the daily series of temperature ranged 0.0%–0.0% across the cities.

### **Philippines**

We collected data from 4 cities (see the full list in Table S2) from 1 January 2006 to 31 December 2010. Daily suicide counts were obtained from the Philippine Statistics Authority-National Statistics Office. Daily mean temperature series were obtained from the National Oceanic and Atmospheric Administration. The missing rates for the daily series of temperature ranged 0.0%–0.8% (0.0%–0.7% after removing stratum without suicide) across the cities.

### **South Africa**

We collected data from 52 districts from 1 January 2000 to 31 December 2013 and excluded 13 districts (6 with substantial missing values of temperature above 30% and 7 with a few suicides less than 30 for the entire study period). Therefore, a total of 39 districts were included in our study (see the full list in Table S2). Daily suicide counts were kindly supplied by Statistics South Africa, who had no role in the data analysis or interpretation. It is likely that the suicide dataset was underreported, compared with the previous publications (Pillay-van Wyk et al. 2016; WHO 2014). Daily mean temperature was obtained from the Agricultural Research Council of South Africa and the National Oceanographic and Atmospheric Association (NOAA) of the United States; the latter was also the source of the daily total of sunshine duration. The missing rates for the daily series of temperature ranged 0.0%–28.9% (0.0%–22.2% after removing stratum without suicide) across the districts.

### **Spain**

We collected data from 52 provincial capital cities from 1 January 1990 to 31 December 2013 and excluded two cities (Palencia with no temperature data since 1991 and Ceuta with no temperature data before 2003). A total of 50 cities were included in our study (see the full list in Table S2). Daily suicide counts were obtained from Spain National Institute of Statistics. Daily mean temperature and the daily total of sunshine duration were obtained from Spain National Meteorology Agency. The missing rates for the daily series of temperature ranged 0.0%–16.8% (0.0%–15.2% after removing stratum without suicide) across the cities.

### **Switzerland**

We collected data from 8 regions (cantons; see the full list in Table S2) from 1 January 1995 to 31 December 2013. Daily suicide counts were obtained from the Federal Office of Statistics. The suicide data includes in part assisted suicide from 1995 to 2008. Daily mean temperature, relative humidity, and the daily total of sunshine duration were collected from the IDAWEB web database (a service provided by MeteoSwiss, the Swiss Federal Office of Meteorology and Climatology, MeteoSwiss). A single weather station within each canton was selected (Basel-Stadt: Basel/Binningen; Berne: Berne/Zollikofen; Geneva: Genève/Cointrin; Ticino: Lugano; Lucerne: Lucerne; Vaud: Pully; St. Gallen: St. Gallen; Zurich: Zurich/Fluntern). The missing rates for the daily series of temperature ranged 0.0%–0.0% across the regions.

### **Taiwan**

We collected data from 3 cities (see the full list in Table S2) from 1 January 1994 to 31 December 2007. Daily suicide counts were obtained from the Department of Statistics, Ministry of Health and Welfare in Taiwan. Daily mean temperature, relative humidity, and the daily total of sunshine duration were obtained

from the Taiwan Environmental Protection Administration. The missing rates for the daily series of temperature ranged 0.0%–0.0% across the cities.

## **UK**

We collected data from 10 regions in England and Wales (see the full list in Table S2) from 1 January 1990 to 31 December 2011. Daily suicide counts were obtained from the Office of National Statistics. Daily mean temperature and the daily total of sunshine duration were obtained from the British Atmospheric Data Centre. The missing rates for the daily series of temperature ranged 0.0%–0.0% across the regions.

## **USA**

We collected data from 135 cities from 1 January 2001 to 31 December 2005 and excluded Honolulu with no suicide in the study period. A total of 134 cities were included in our study (see the full list in Table S2). Daily suicide counts were obtained from the National Center for Health Statistics. Daily mean temperature and relative humidity were obtained from the National Climate Data Center of the National Oceanic and Atmospheric Administration. The missing rates for the daily series of temperature ranged 0.0%–11.2% (0.0%–11.7% after removing stratum without suicide) across the cities.

## **Vietnam**

We collected data from Ho Chi Minh City from 1 January 2010 to 31 December 2013. Daily suicide counts were obtained from the official book named A6 provided by Vietnam Ministry of Health. Daily mean temperature and relative humidity were obtained from the National Climate Data Center of the National Oceanic and Atmospheric Administration. There was no missing of the daily series of temperature.

**Table S1.** Summary statistics of other weather variables and additional information by country.

| Country      | Latitude <sup>a</sup> | Longitude <sup>a</sup> | Relative humidity (RH) <sup>b</sup> | Locations for RH | Sunshine hours (SH) <sup>b</sup> | Locations for SH | Days with high temperature <sup>c</sup> | RR per 1 °C increase <sup>d</sup> |
|--------------|-----------------------|------------------------|-------------------------------------|------------------|----------------------------------|------------------|-----------------------------------------|-----------------------------------|
| Brazil       | -14.4 (-30.0, -3.1)   | -43.4 (-60.0, -35.2)   | 76.1 (64.3–83.9)                    | 13               | NA                               | NA               | 182 (41–339)                            | 1.042 (1.005, 1.080)              |
| Canada       | 45.5 (42.3, 53.5)     | -81.1 (-123.3, -52.7)  | 73.1 (61.7–83.5)                    | 24               | NA                               | NA               | 3 (0–6)                                 | 1.010 (1.006, 1.014)              |
| Japan        | 35.2 (26.2, 43.1)     | 136.2 (127.7, 141.3)   | 70.0 (62.0–77.4)                    | 47               | 5.3 (4.4–6.1)                    | 47               | 59 (45–69)                              | 1.013 (1.011, 1.014)              |
| South Korea  | 36.1 (35.2, 37.6)     | 127.2 (126.6, 129.1)   | 64.5 (58.9–68.3)                    | 6                | 6.0 (5.5–6.3)                    | 6                | 43 (41–49)                              | 1.016 (1.013, 1.019)              |
| Philippines  | 12.4 (7.1, 14.7)      | 122.5 (121.0, 125.6)   | NA                                  | NA               | NA                               | NA               | 358 (354–360)                           | 1.061 (0.924, 1.218)              |
| South Africa | -28.6 (-34.5, -23.3)  | 27.6 (18.0, 32.5)      | NA                                  | NA               | NA                               | NA               | 15 (3–47)                               | 1.031 (1.014, 1.049)              |
| Spain        | 40.7 (28.2, 43.5)     | -3.7 (-16.3, 2.8)      | NA                                  | NA               | 7.1 (4.5–8.3)                    | 50               | 29 (7–57)                               | 1.017 (1.010, 1.024)              |
| Switzerland  | 47.0 (46.0, 47.6)     | 7.9 (6.1, 9.4)         | 74.2 (68.6–77.5)                    | 8                | 4.9 (4.1–5.9)                    | 8                | 3 (1–4)                                 | 1.013 (1.007, 1.020)              |
| Taiwan       | 24.2 (22.6, 25.0)     | 120.7 (120.3, 121.6)   | 75.6 (74.8–76.1)                    | 3                | 5.3 (4.0–6.1)                    | 3                | 177 (166–198)                           | 1.031 (1.021, 1.042)              |
| UK           | 52.4 (51.0, 55.0)     | -1.5 (-3.7, 0.4)       | NA                                  | NA               | 4.3 (3.9–4.6)                    | 10               | 0 (0–0)                                 | 1.014 (1.009, 1.018)              |
| USA          | 39.0 (25.8, 47.7)     | -83.4 (-122.7, -70.3)  | 67.0 (29.8–77.2)                    | 134              | NA                               | NA               | 37 (17–95)                              | 1.008 (1.005, 1.011)              |
| Vietnam      | 10.8 (10.8, 10.8)     | 106.7 (106.7, 106.7)   | 74.1 (74.1–74.1)                    | 1                | NA                               | NA               | 363 (363–363)                           | 1.169 (0.993, 1.375)              |
| Total        |                       |                        |                                     | 236              |                                  | 124              |                                         |                                   |

<sup>a</sup>Median values and ranges (minimum and maximum) of the location-specific latitude and longitude.

<sup>b</sup>Mean values and ranges (minimum and maximum) of the location-specific relative humidity and sunshine duration over the study periods. NA: not applicable.

<sup>c</sup>Median values and IQRs (25<sup>th</sup>–75<sup>th</sup> percentiles) of the annual number of hotter days, defined as the daily mean temperature above 25 °C that is the absolute mean temperature of maximum suicide temperature (MaxST) approximately between Japan and South Korea.

<sup>d</sup>The RRs per 1 °C increase in temperature. The point estimates of the RRs varied considerably in the range of temperature distributions: from the broader ranges in north America (the USA and Canada), temperate regions (Japan, Switzerland, the UK, Spain, and South Korea), subtropics (South Africa, Brazil, and Taiwan), to the narrower ranges in tropics (the Philippines and Vietnam).

**Table S2.** Location-specific total number of suicide, average temperature (°C), maximum suicide temperature (°C) (MaxST) and lag-cumulative relative risk (RR) for the MaxST vs. MinST, estimated by using a conditional Poisson model adjusting for seasonality, long-term time trend, and the day-of-week from the first-stage modeling.

| Country | Location             | Suicide | Temperature | MaxST | RR (95% CI)        |
|---------|----------------------|---------|-------------|-------|--------------------|
| Brazil  | Belo Horizonte       | 843     | 22.0        | 23.2  | 1.4 (0.97, 2.04)   |
| Brazil  | Brasilia             | 622     | 21.3        | 22.1  | 1.35 (0.88, 2.07)  |
| Brazil  | Campo Grande         | 266     | 25.8        | 27.9  | 0.84 (0.43, 1.63)  |
| Brazil  | Curitiba             | 635     | 17.6        | 19.6  | 0.97 (0.61, 1.54)  |
| Brazil  | Fortaleza            | 886     | 27.0        | 27.5  | 1.61 (1.00, 2.59)  |
| Brazil  | Maceio               | 169     | 24.9        | 25.7  | 2.05 (0.82, 5.09)  |
| Brazil  | Manaus               | 442     | 27.1        | 27.8  | 0.96 (0.58, 1.59)  |
| Brazil  | Natal                | 140     | 19.7        | 22.2  | 0.87 (0.33, 2.32)  |
| Brazil  | Porto Alegre         | 800     | 19.7        | 22.2  | 1.51 (0.98, 2.33)  |
| Brazil  | Salvador             | 178     | 25.7        | 26.5  | 0.91 (0.35, 2.39)  |
| Brazil  | Sao Paulo            | 3301    | 20.3        | 22.0  | 0.99 (0.80, 1.23)  |
| Brazil  | Teresina             | 301     | 27.6        | 28.4  | 1.78 (0.85, 3.73)  |
| Brazil  | Vitoria              | 218     | 26.8        | 27.3  | 0.60 (0.27, 1.34)  |
| Canada  | Abbotsford           | 253     | 10.7        | 22.7  | 4.14 (0.62, 27.71) |
| Canada  | Calgary              | 1656    | 4.6         | 21.2  | 1.66 (0.96, 2.88)  |
| Canada  | Edmonton             | 2290    | 4.8         | 23.0  | 1.28 (0.77, 2.11)  |
| Canada  | Halifax              | 566     | 6.4         | 23.1  | 2.12 (0.71, 6.33)  |
| Canada  | Hamilton             | 536     | 7.9         | 25.7  | 1.19 (0.40, 3.53)  |
| Canada  | Kingston             | 313     | 7.4         | 25.3  | 2.07 (0.44, 9.78)  |
| Canada  | Kitchener - Waterloo | 426     | 7.1         | 25.1  | 1.58 (0.48, 5.21)  |
| Canada  | London               | 581     | 8.0         | 25.8  | 0.67 (0.22, 2.03)  |
| Canada  | Montreal             | 4022    | 6.7         | 25.7  | 1.33 (0.90, 1.99)  |
| Canada  | Niagara              | 621     | 9.1         | 26.2  | 1.66 (0.62, 4.45)  |
| Canada  | Oakville             | 384     | 8.3         | 26.0  | 2.31 (0.55, 9.70)  |
| Canada  | Oshawa               | 453     | 7.6         | 24.9  | 3.80 (1.06, 13.59) |
| Canada  | Ottawa               | 1281    | 6.4         | 25.9  | 2.44 (1.18, 5.02)  |
| Canada  | Regina               | 426     | 3.4         | 24.5  | 1.69 (0.56, 5.09)  |
| Canada  | Saint John NB        | 276     | 5.1         | 20.9  | 0.54 (0.11, 2.69)  |
| Canada  | Sarnia               | 179     | 8.7         | 26.9  | 5.87 (1.01, 34.13) |
| Canada  | Saskatoon            | 456     | 2.7         | 24.0  | 1.23 (0.41, 3.65)  |
| Canada  | Sault Ste. Marie     | 218     | 4.9         | 23.5  | 5.92 (1.25, 28.1)  |



|        |              |       |      |      |                   |
|--------|--------------|-------|------|------|-------------------|
| Canada | St. John NFL | 275   | 4.8  | 20.9 | 0.46 (0.09, 2.33) |
| Canada | Sudbury      | 429   | 4.1  | 24.5 | 1.61 (0.49, 5.32) |
| Canada | Thunder bay  | 328   | 2.9  | 22.7 | 0.84 (0.2, 3.46)  |
| Canada | Toronto      | 4896  | 8.1  | 26.5 | 1.75 (1.18, 2.59) |
| Canada | Vancouver    | 2450  | 10.6 | 21.2 | 1.41 (0.81, 2.46) |
| Canada | Victoria     | 496   | 10.2 | 20.4 | 0.72 (0.24, 2.16) |
| Canada | Windsor      | 524   | 9.9  | 27.7 | 1.13 (0.36, 3.56) |
| Canada | Winnipeg     | 1284  | 3.1  | 25.1 | 1.88 (1.00, 3.54) |
| Japan  | Aichi        | 46915 | 15.7 | 25.8 | 1.19 (1.04, 1.36) |
| Japan  | Akita        | 15016 | 11.7 | 23.6 | 1.47 (1.16, 1.86) |
| Japan  | Aomori       | 14835 | 10.3 | 22.4 | 1.71 (1.36, 2.16) |
| Japan  | Chiba        | 37585 | 15.7 | 25.5 | 1.30 (1.13, 1.51) |
| Japan  | Ehime        | 12820 | 16.3 | 25.8 | 1.16 (0.91, 1.47) |
| Japan  | Fukui        | 6305  | 14.5 | 25.4 | 1.48 (1.05, 2.09) |
| Japan  | Fukuoka      | 39820 | 16.9 | 25.9 | 1.22 (1.07, 1.40) |
| Japan  | Fukushima    | 17515 | 13.0 | 23.9 | 1.31 (1.07, 1.61) |
| Japan  | Gifu         | 16552 | 15.8 | 26.4 | 1.38 (1.10, 1.72) |
| Japan  | Gunma        | 17283 | 14.5 | 25.8 | 1.49 (1.21, 1.83) |
| Japan  | Hiroshima    | 21819 | 15.9 | 26.8 | 1.38 (1.14, 1.67) |
| Japan  | Hokkaido     | 47342 | 8.8  | 21.5 | 1.52 (1.33, 1.74) |
| Japan  | Hyogo        | 42307 | 16.3 | 26.4 | 1.33 (1.16, 1.53) |
| Japan  | Ibaraki      | 21673 | 13.6 | 24.1 | 1.33 (1.10, 1.60) |
| Japan  | Ishikawa     | 8731  | 14.6 | 25.2 | 1.09 (0.81, 1.48) |
| Japan  | Iwate        | 16034 | 10.2 | 22.0 | 1.52 (1.21, 1.91) |
| Japan  | Kagawa       | 7786  | 16.1 | 26.4 | 1.54 (1.12, 2.13) |
| Japan  | Kagoshima    | 16712 | 18.3 | 26.8 | 1.38 (1.13, 1.68) |
| Japan  | Kanagawa     | 52862 | 15.7 | 24.9 | 1.27 (1.13, 1.43) |
| Japan  | Kochi        | 8019  | 16.9 | 26.2 | 1.31 (0.97, 1.76) |
| Japan  | Kumamoto     | 15142 | 16.8 | 26.4 | 1.41 (1.14, 1.75) |
| Japan  | Kyoto        | 19373 | 15.8 | 26.7 | 1.51 (1.24, 1.84) |
| Japan  | Mie          | 12964 | 15.8 | 26.9 | 1.43 (1.10, 1.86) |
| Japan  | Miyagi       | 17308 | 12.4 | 23.6 | 1.37 (1.11, 1.68) |
| Japan  | Miyazaki     | 11839 | 17.5 | 26.9 | 1.75 (1.37, 2.23) |
| Japan  | Nagano       | 17761 | 11.9 | 23.9 | 1.58 (1.28, 1.95) |
| Japan  | Nagasaki     | 12655 | 17.1 | 26.6 | 1.52 (1.20, 1.92) |
| Japan  | Nara         | 9058  | 14.8 | 25.3 | 1.20 (0.90, 1.61) |

|              |                |       |      |      |                       |
|--------------|----------------|-------|------|------|-----------------------|
| Japan        | Niigata        | 26981 | 13.8 | 25.4 | 1.52 (1.27, 1.83)     |
| Japan        | Oita           | 10164 | 16.3 | 25.8 | 1.20 (0.91, 1.59)     |
| Japan        | Okayama        | 13825 | 15.9 | 26.2 | 1.50 (1.18, 1.91)     |
| Japan        | Okinawa        | 10063 | 22.9 | 28.4 | 1.39 (1.10, 1.76)     |
| Japan        | Osaka          | 68076 | 16.8 | 26.2 | 1.24 (1.12, 1.39)     |
| Japan        | Saga           | 6958  | 16.5 | 26.5 | 1.53 (1.10, 2.11)     |
| Japan        | Saitama        | 45259 | 14.9 | 25.5 | 1.23 (1.08, 1.41)     |
| Japan        | Shiga          | 8977  | 14.6 | 25.0 | 1.42 (1.05, 1.93)     |
| Japan        | Shimane        | 8270  | 14.8 | 25.4 | 1.66 (1.23, 2.24)     |
| Japan        | Shizuoka       | 25607 | 16.5 | 25.8 | 1.38 (1.16, 1.63)     |
| Japan        | Tochigi        | 16532 | 13.7 | 24.1 | 1.32 (1.06, 1.65)     |
| Japan        | Tokushima      | 6315  | 16.5 | 26.2 | 1.41 (1.00, 2.00)     |
| Japan        | Tokyo          | 87045 | 16.2 | 25.9 | 1.27 (1.15, 1.39)     |
| Japan        | Tottori        | 5156  | 14.8 | 25.4 | 1.35 (0.93, 1.95)     |
| Japan        | Toyama         | 10355 | 14.0 | 25.7 | 1.65 (1.25, 2.18)     |
| Japan        | Wakayama       | 9975  | 16.6 | 26.5 | 1.45 (1.09, 1.92)     |
| Japan        | Yamagata       | 11630 | 11.7 | 23.9 | 1.56 (1.19, 2.05)     |
| Japan        | Yamaguchi      | 13966 | 15.3 | 25.7 | 1.52 (1.21, 1.91)     |
| Japan        | Yamanashi      | 7161  | 14.6 | 25.4 | 1.44 (1.03, 2.01)     |
| South Korea  | Busan          | 16111 | 14.9 | 24.3 | 1.45 (1.18, 1.78)     |
| South Korea  | Daegu          | 9637  | 14.4 | 25.6 | 1.43 (1.10, 1.86)     |
| South Korea  | Daejeon        | 5812  | 13.0 | 24.9 | 1.48 (1.04, 2.10)     |
| South Korea  | Gwangju        | 4913  | 14.0 | 25.2 | 1.77 (1.22, 2.59)     |
| South Korea  | Incheon        | 11535 | 12.4 | 24.4 | 1.64 (1.27, 2.12)     |
| South Korea  | Seoul          | 35817 | 12.8 | 25.4 | 1.78 (1.54, 2.05)     |
| Philippines  | Cebu           | 254   | 28.0 | 28.1 | 1.43 (0.68, 2.98)     |
| Philippines  | Davao          | 214   | 28.3 | 28.6 | 0.83 (0.38, 1.81)     |
| Philippines  | Manila         | 509   | 28.6 | 28.7 | 0.95 (0.59, 1.52)     |
| Philippines  | Quezon         | 290   | 27.4 | 27.4 | 1.78 (0.95, 3.33)     |
| South Africa | Alfred Nzo     | 89    | 16.6 | 25.7 | 0.94 (0.07, 12.33)    |
| South Africa | Amathole       | 200   | 17.9 | 27.9 | 0.74 (0.13, 4.13)     |
| South Africa | Bojanala       | 69    | 18.7 | 26.5 | 3.60 (0.09, 147.61)   |
| South Africa | Buffalo City   | 37    | 12.4 | 19.8 | 0.19 (0.01, 7.40)     |
| South Africa | Cape Winelands | 85    | 15.8 | 26.3 | 1.01 (0.16, 6.42)     |
| South Africa | Capricorn      | 30    | 19.3 | 26.5 | 84.18 (0.87, 8120.45) |
| South Africa | Chris Hani     | 59    | 15.6 | 25.8 | 0.40 (0.02, 6.60)     |

|              |                           |     |      |      |                         |
|--------------|---------------------------|-----|------|------|-------------------------|
| South Africa | City of Cape Town         | 439 | 17.8 | 27.1 | 1.46 (0.47, 4.46)       |
| South Africa | City of Johannesburg      | 74  | 16.5 | 23.6 | 3.31 (0.18, 60.56)      |
| South Africa | City of Tshwane           | 117 | 16.1 | 23.9 | 0.47 (0.03, 6.38)       |
| South Africa | Dr Kenneth Kaunda         | 60  | 18.2 | 27.1 | 3.60 (0.22, 58.16)      |
| South Africa | Dr Ruth Segomotsi Mompati | 35  | 20.0 | 29.4 | 0.33 (0.00, 136.32)     |
| South Africa | Eden                      | 174 | 17.7 | 28.5 | 3.18 (0.39, 26.02)      |
| South Africa | Ehlanzeni                 | 255 | 20.4 | 27.5 | 0.91 (0.19, 4.49)       |
| South Africa | Ekurhuleni                | 49  | 16.3 | 23.5 | 0.09 (0.00, 15.06)      |
| South Africa | Frances Baard             | 135 | 18.9 | 28.3 | 4.03 (0.46, 35.50)      |
| South Africa | Gert Sibande              | 197 | 16.4 | 23.3 | 0.78 (0.13, 4.66)       |
| South Africa | Joe Gqabi                 | 45  | 16.0 | 25.0 | 4.17 (0.12, 141.44)     |
| South Africa | Lejweleputswa             | 130 | 17.1 | 26.1 | 1.67 (0.20, 13.9)       |
| South Africa | Mangaung                  | 113 | 16.6 | 26.2 | 12.40 (0.94, 163.73)    |
| South Africa | Mopani                    | 293 | 21.7 | 29.8 | 3.62 (0.77, 17.06)      |
| South Africa | Namakwa                   | 47  | 18.8 | 29.4 | 1.56 (0.10, 25.32)      |
| South Africa | Nelson Mandela Bay        | 149 | 17.7 | 25.6 | 42.14 (1.62, 1092.78)   |
| South Africa | Ngaka Modiri Molema       | 240 | 19.8 | 27.6 | 4.17 (0.90, 19.23)      |
| South Africa | Nkangala                  | 65  | 16.1 | 23.6 | 0.02 (0.00, 1.69)       |
| South Africa | O. R. Tambo               | 59  | 17.1 | 26.6 | 174.82 (0.39, 77958.33) |
| South Africa | Overberg                  | 73  | 16.9 | 26.5 | 4.88 (0.16, 150.61)     |
| South Africa | Pixley ka Seme            | 77  | 18.1 | 27.8 | 16.7 (1.13, 246.66)     |
| South Africa | Sisonke                   | 326 | 14.2 | 22.0 | 1.42 (0.24, 8.41)       |
| South Africa | Siyanda                   | 312 | 20.6 | 31.3 | 1.13 (0.26, 4.84)       |
| South Africa | Thabo Mofutsanyane        | 46  | 14.9 | 22.6 | 4.60 (0.07, 320.43)     |
| South Africa | Ugu                       | 110 | 21.2 | 26.9 | 1.73 (0.27, 11.17)      |
| South Africa | West Coast                | 38  | 19.2 | 30.5 | 0.49 (0.02, 11.97)      |
| South Africa | eThekweni                 | 96  | 21.5 | 28.1 | 5.83 (0.75, 45.38)      |
| South Africa | uMgungundlovu             | 175 | 14.1 | 22.3 | 2.53 (0.34, 18.72)      |
| South Africa | uMkhanyakude              | 90  | 22.5 | 29.9 | 5.41 (0.30, 98.55)      |
| South Africa | uMzinyathi                | 208 | 16.1 | 25.0 | 1.34 (0.16, 10.93)      |
| South Africa | uThukela                  | 58  | 15.6 | 23.1 | 8.86 (0.16, 482.85)     |
| South Africa | uThungulu                 | 274 | 22.7 | 30.9 | 0.73 (0.21, 2.48)       |
| Spain        | A Coruna                  | 532 | 15.0 | 23.0 | 0.84 (0.30, 2.38)       |
| Spain        | Albacete                  | 227 | 14.5 | 28.4 | 3.30 (0.64, 16.97)      |
| Spain        | Alicante                  | 585 | 18.4 | 28.4 | 1.33 (0.44, 4.08)       |
| Spain        | Almeria                   | 321 | 19.1 | 30.4 | 5.47 (1.26, 23.68)      |

|       |                   |      |      |      |                     |
|-------|-------------------|------|------|------|---------------------|
| Spain | Avila             | 63   | 11.2 | 25.7 | 1.00 (0.03, 31.78)  |
| Spain | Badajoz           | 141  | 17.2 | 30.8 | 1.53 (0.13, 17.44)  |
| Spain | Barcelona         | 2578 | 16.4 | 27.6 | 1.71 (0.91, 3.23)   |
| Spain | Bilbao            | 662  | 14.8 | 26.0 | 1.98 (0.90, 4.33)   |
| Spain | Burgos            | 308  | 10.9 | 24.6 | 1.66 (0.54, 5.15)   |
| Spain | Caceres           | 99   | 16.4 | 31.2 | 3.95 (0.23, 68.11)  |
| Spain | Cadiz             | 242  | 18.6 | 29.0 | 1.72 (0.33, 8.92)   |
| Spain | Castellon         | 317  | 17.8 | 28.2 | 2.92 (0.67, 12.78)  |
| Spain | Ciudad Real       | 88   | 15.8 | 30.6 | 0.33 (0.04, 3.10)   |
| Spain | Cordoba           | 489  | 18.3 | 31.8 | 1.01 (0.33, 3.11)   |
| Spain | Cuenca            | 87   | 13.4 | 27.8 | 5.06 (0.34, 74.54)  |
| Spain | Girona            | 117  | 15.0 | 27.2 | 1.11 (0.08, 16.24)  |
| Spain | Granada           | 520  | 21.3 | 27.6 | 0.49 (0.17, 1.36)   |
| Spain | Guadalajara       | 94   | 13.4 | 27.4 | 3.00 (0.23, 38.97)  |
| Spain | Huelva            | 186  | 18.3 | 30.1 | 1.23 (0.20, 7.64)   |
| Spain | Huesca            | 103  | 14.2 | 28.8 | 1.87 (0.21, 16.94)  |
| Spain | Jaen              | 233  | 17.0 | 31.7 | 1.47 (0.36, 5.95)   |
| Spain | Palmas G. Canaria | 671  | 21.3 | 27.6 | 1.21 (0.40, 3.69)   |
| Spain | Leon              | 223  | 11.1 | 24.9 | 1.81 (0.43, 7.53)   |
| Spain | Lleida            | 238  | 15.2 | 28.8 | 2.31 (0.55, 9.64)   |
| Spain | Logrono           | 296  | 14.1 | 27.8 | 0.83 (0.22, 3.06)   |
| Spain | Lugo              | 228  | 12.1 | 23.4 | 1.00 (0.24, 4.08)   |
| Spain | Madrid            | 2180 | 15.2 | 29.9 | 1.17 (0.66, 2.05)   |
| Spain | Malaga            | 1113 | 18.7 | 30.2 | 1.68 (0.73, 3.84)   |
| Spain | Palma Mallorca    | 553  | 16.8 | 28.2 | 1.99 (0.63, 6.24)   |
| Spain | Melilla           | 66   | 19.1 | 29.0 | 1.20 (0.01, 115.59) |
| Spain | Murcia            | 585  | 18.8 | 30.4 | 2.78 (0.87, 8.86)   |
| Spain | Ourense           | 233  | 15.1 | 27.4 | 1.87 (0.40, 8.75)   |
| Spain | Oviedo            | 517  | 13.3 | 23.2 | 2.44 (1.08, 5.47)   |
| Spain | Pamplona          | 413  | 13.1 | 27.2 | 1.66 (0.42, 6.58)   |
| Spain | Pontevedra        | 133  | 14.8 | 25.4 | 1.20 (0.23, 6.32)   |
| Spain | Salamanca         | 242  | 12.3 | 25.7 | 1.33 (0.27, 6.50)   |
| Spain | San Sebastian     | 344  | 13.7 | 24.8 | 5.14 (1.27, 20.80)  |
| Spain | Santander         | 207  | 14.6 | 23.9 | 0.27 (0.06, 1.16)   |
| Spain | Segovia           | 78   | 12.4 | 27.5 | 1.06 (0.05, 24.16)  |
| Spain | Sevilla           | 1173 | 19.5 | 32.4 | 1.43 (0.69, 2.97)   |

|             |                         |       |      |      |                      |
|-------------|-------------------------|-------|------|------|----------------------|
| Spain       | Soria                   | 105   | 11.1 | 24.8 | 6.39 (0.20, 204.57)  |
| Spain       | Tarragona               | 226   | 17.9 | 29.4 | 0.57 (0.12, 2.77)    |
| Spain       | Tenerife                | 337   | 21.6 | 28.4 | 1.34 (0.22, 8.18)    |
| Spain       | Teruel                  | 67    | 12.3 | 25.7 | 1.98 (0.11, 34.36)   |
| Spain       | Toledo                  | 82    | 16.0 | 30.8 | 14.22 (0.71, 285.31) |
| Spain       | Valencia                | 1458  | 18.5 | 28.6 | 2.34 (1.14, 4.78)    |
| Spain       | Valladolid              | 605   | 12.9 | 27.2 | 1.21 (0.37, 3.92)    |
| Spain       | Vitoria                 | 447   | 11.9 | 25.1 | 1.28 (0.46, 3.58)    |
| Spain       | Zamora                  | 110   | 13.3 | 27.5 | 3.02 (0.31, 29.60)   |
| Spain       | Zaragoza                | 1076  | 15.7 | 29.8 | 0.99 (0.42, 2.31)    |
| Switzerland | Basel-Stadt             | 1435  | 9.7  | 24.2 | 2.00 (1.09, 3.65)    |
| Switzerland | Berne                   | 3366  | 9.4  | 23.6 | 1.81 (1.20, 2.72)    |
| Switzerland | Geneva                  | 1341  | 9.9  | 24.3 | 1.05 (0.54, 2.08)    |
| Switzerland | Vaud                    | 2081  | 10.8 | 25.0 | 1.22 (0.72, 2.05)    |
| Switzerland | Ticino                  | 670   | 8.6  | 23.5 | 0.69 (0.28, 1.70)    |
| Switzerland | Lucerne                 | 1019  | 12.9 | 25.9 | 1.75 (0.76, 4.03)    |
| Switzerland | St. Gallen              | 1533  | 11.3 | 25.2 | 1.69 (0.91, 3.13)    |
| Switzerland | Zurich                  | 4577  | 11.0 | 25.3 | 1.37 (0.95, 1.98)    |
| Taiwan      | Kaohsiung               | 5050  | 25.2 | 29.3 | 2.07 (1.54, 2.79)    |
| Taiwan      | Taichung                | 3352  | 23.6 | 28.8 | 1.95 (1.34, 2.84)    |
| Taiwan      | Taipei                  | 9481  | 23.2 | 29.0 | 1.49 (1.24, 1.79)    |
| UK          | East                    | 7502  | 10.4 | 21.4 | 1.46 (1.09, 1.94)    |
| UK          | East Midlands           | 6120  | 10.0 | 21.0 | 1.46 (1.07, 2.00)    |
| UK          | London                  | 8976  | 11.6 | 23.2 | 1.46 (1.13, 1.87)    |
| UK          | North East              | 3806  | 9.4  | 19.5 | 1.42 (0.97, 2.07)    |
| UK          | North West              | 11074 | 10.0 | 19.7 | 1.12 (0.90, 1.40)    |
| UK          | South East              | 12089 | 10.7 | 21.2 | 1.22 (0.97, 1.52)    |
| UK          | South West              | 8011  | 10.6 | 20.2 | 1.16 (0.89, 1.52)    |
| UK          | Wales                   | 5329  | 10.2 | 19.7 | 1.28 (0.92, 1.77)    |
| UK          | West Midlands           | 7438  | 10.0 | 20.8 | 1.62 (1.22, 2.14)    |
| UK          | Yorkshire & Humber      | 7770  | 9.9  | 20.6 | 1.52 (1.16, 2.00)    |
| USA         | Akron, OH               | 367   | 10.2 | 25.3 | 1.97 (0.70, 5.54)    |
| USA         | Albuquerque, NM         | 620   | 14.6 | 29.2 | 0.94 (0.29, 2.99)    |
| USA         | Allentown-Bethlehem, PA | 227   | 11.1 | 25.8 | 1.61 (0.40, 6.53)    |
| USA         | Atlanta, GA             | 1603  | 17.0 | 28.9 | 1.03 (0.54, 1.97)    |
| USA         | Atlantic City, NJ       | 134   | 12.6 | 29.4 | 22.59 (1.49, 343.68) |

|     |                                |      |      |      |                    |
|-----|--------------------------------|------|------|------|--------------------|
| USA | Austin, TX                     | 605  | 21.0 | 31.9 | 0.97 (0.34, 2.76)  |
| USA | Bakersfield, CA                | 419  | 18.8 | 33.6 | 0.74 (0.22, 2.52)  |
| USA | Baltimore, MD                  | 731  | 13.2 | 28.6 | 0.90 (0.38, 2.11)  |
| USA | Barnstable-Yarmouth, MA        | 120  | 10.7 | 25.8 | 1.42 (0.11, 18.69) |
| USA | Baton Rouge, LA                | 221  | 20.1 | 30.0 | 2.18 (0.35, 13.62) |
| USA | Bergen-Passaic, NJ             | 474  | 13.1 | 30.3 | 1.08 (0.27, 4.38)  |
| USA | Birmingham, AL                 | 649  | 17.4 | 29.5 | 1.12 (0.38, 3.29)  |
| USA | Boston, MA                     | 957  | 11.0 | 27.2 | 1.49 (0.66, 3.34)  |
| USA | Brownsville, TX                | 116  | 24.0 | 31.4 | 1.14 (0.16, 8.15)  |
| USA | Buffalo, NY                    | 381  | 9.5  | 25.3 | 1.58 (0.52, 4.80)  |
| USA | Canton-Massillon, OH           | 213  | 10.2 | 25.3 | 7.51 (1.70, 33.04) |
| USA | Charleston, WV                 | 173  | 13.3 | 26.7 | 0.78 (0.13, 4.70)  |
| USA | Charlotte, NC                  | 420  | 15.8 | 28.3 | 0.82 (0.21, 3.17)  |
| USA | Chattanooga, TN                | 206  | 16.3 | 29.2 | 0.78 (0.08, 7.24)  |
| USA | Chicago, IL                    | 2886 | 10.4 | 28.6 | 1.27 (0.79, 2.03)  |
| USA | Cincinnati, OH                 | 513  | 12.6 | 26.7 | 0.79 (0.28, 2.20)  |
| USA | Cleveland, OH                  | 1197 | 10.7 | 25.6 | 0.78 (0.46, 1.35)  |
| USA | Columbia, SC                   | 326  | 17.8 | 30.3 | 0.67 (0.16, 2.89)  |
| USA | Columbus, OH                   | 658  | 12.0 | 27.2 | 2.68 (1.03, 6.98)  |
| USA | Dallas, TX                     | 1263 | 19.4 | 32.8 | 0.86 (0.39, 1.91)  |
| USA | Dayton, OH                     | 395  | 11.3 | 26.4 | 1.32 (0.40, 4.30)  |
| USA | Daytona Beach, FL              | 537  | 21.8 | 29.2 | 0.45 (0.15, 1.33)  |
| USA | Denver, CO                     | 1419 | 10.6 | 26.9 | 1.51 (0.78, 2.90)  |
| USA | Des Moines, IA                 | 263  | 10.9 | 28.1 | 1.02 (0.26, 4.03)  |
| USA | Detroit, MI                    | 2386 | 10.5 | 26.4 | 0.87 (0.58, 1.29)  |
| USA | Dutchess County, NY            | 96   | 10.4 | 27.2 | 0.50 (0.04, 6.37)  |
| USA | El Paso, TX                    | 291  | 18.6 | 32.2 | 1.99 (0.38, 10.33) |
| USA | Erie, PA                       | 158  | 10.1 | 25.8 | 0.63 (0.11, 3.47)  |
| USA | Flint, MI                      | 287  | 9.1  | 26.1 | 3.54 (1.03, 12.12) |
| USA | Fort Myers-Cape Coral, FL      | 494  | 23.7 | 29.7 | 0.90 (0.23, 3.63)  |
| USA | Fort Pierce-Port St. Lucie, FL | 327  | 23.0 | 29.2 | 1.54 (0.40, 5.97)  |
| USA | Fort Worth-Arlington, TX       | 917  | 19.1 | 33.1 | 1.68 (0.62, 4.57)  |
| USA | Fresno, CA                     | 436  | 18.3 | 33.1 | 1.04 (0.30, 3.55)  |
| USA | Ft. Lauderdale, FL             | 1267 | 22.9 | 29.4 | 1.65 (0.78, 3.48)  |
| USA | Galveston, TX                  | 208  | 20.5 | 29.4 | 1.06 (0.14, 8.16)  |
| USA | Gary, IN                       | 274  | 10.2 | 26.9 | 1.76 (0.41, 7.53)  |

|     |                                   |      |      |      |                      |
|-----|-----------------------------------|------|------|------|----------------------|
| USA | Grand Rapids, MI                  | 292  | 9.4  | 26.1 | 0.63 (0.17, 2.41)    |
| USA | Greensboro, NC                    | 269  | 15.2 | 28.3 | 2.64 (0.52, 13.50)   |
| USA | Greenville, SC                    | 303  | 16.2 | 28.6 | 0.81 (0.16, 4.24)    |
| USA | Hamilton, OH                      | 227  | 12.6 | 27.2 | 2.14 (0.35, 12.94)   |
| USA | Harrisburg-Carlisle, PA           | 140  | 12.2 | 28.1 | 0.23 (0.02, 2.17)    |
| USA | Hartford, CT                      | 393  | 10.5 | 27.2 | 2.07 (0.65, 6.53)    |
| USA | Houston, TX                       | 2072 | 21.1 | 30.9 | 1.80 (1.07, 3.04)    |
| USA | Indianapolis, IN                  | 618  | 12.1 | 27.2 | 0.82 (0.31, 2.12)    |
| USA | Jacksonville, FL                  | 674  | 20.3 | 29.4 | 2.39 (0.81, 7.09)    |
| USA | Jersey City, NJ                   | 162  | 13.1 | 30.3 | 3.47 (0.29, 41.67)   |
| USA | Kansas City, MO-KS                | 1077 | 13.3 | 31.1 | 1.26 (0.55, 2.90)    |
| USA | Knoxville, TN                     | 410  | 15.3 | 28.1 | 1.44 (0.38, 5.47)    |
| USA | Lakeland-Winter Haven, FL         | 389  | 22.7 | 29.2 | 0.31 (0.07, 1.31)    |
| USA | Lancaster, PA                     | 250  | 12.0 | 28.3 | 2.84 (0.57, 14.12)   |
| USA | Lansing, MI                       | 145  | 9.0  | 26.1 | 0.96 (0.12, 7.45)    |
| USA | Las Vegas, NV-AZ                  | 1891 | 20.9 | 37.5 | 2.07 (1.10, 3.89)    |
| USA | Little Rock, AR                   | 272  | 17.2 | 30.9 | 1.71 (0.36, 8.16)    |
| USA | Los Angeles, CA                   | 4167 | 17.2 | 24.7 | 1.48 (1.01, 2.16)    |
| USA | Louisville, KY                    | 525  | 14.7 | 28.9 | 1.30 (0.45, 3.74)    |
| USA | Lubbock, TX                       | 172  | 16.4 | 30.6 | 31.53 (4.36, 227.84) |
| USA | Madison, WI                       | 300  | 8.7  | 25.3 | 1.70 (0.52, 5.55)    |
| USA | McAllen-Edinburg-Mission, TX      | 176  | 24.3 | 32.8 | 0.45 (0.06, 3.38)    |
| USA | Melbourne-Titusville-Palm Bay, FL | 542  | 22.5 | 29.2 | 2.65 (0.78, 9.06)    |
| USA | Memphis, TN                       | 519  | 17.5 | 31.1 | 2.24 (0.67, 7.52)    |
| USA | Miami, FL                         | 1207 | 25.0 | 30.6 | 1.78 (0.81, 3.91)    |
| USA | Middlesex, NJ                     | 244  | 12.0 | 28.7 | 0.86 (0.18, 4.21)    |
| USA | Milwaukee, WI                     | 784  | 9.3  | 27.0 | 1.18 (0.54, 2.58)    |
| USA | Minneapolis-St. Paul, MN          | 887  | 8.7  | 28.9 | 2.57 (1.03, 6.38)    |
| USA | Mobile, AL                        | 233  | 19.8 | 29.2 | 0.63 (0.13, 3.00)    |
| USA | Monmouth-Ocean, NJ                | 515  | 12.1 | 28.9 | 0.70 (0.22, 2.20)    |
| USA | Myrtle Beach, SC                  | 186  | 17.8 | 29.4 | 2.42 (0.34, 16.93)   |
| USA | Naples, FL                        | 210  | 24.1 | 30.0 | 18.46 (1.56, 218.44) |
| USA | Nashua, NH                        | 237  | 9.0  | 25.8 | 1.58 (0.32, 7.85)    |
| USA | Nashville, TN                     | 458  | 15.7 | 29.4 | 5.25 (1.40, 19.6)    |
| USA | Nassau-Suffolk, NY                | 827  | 11.5 | 28.1 | 1.03 (0.34, 3.08)    |
| USA | New Haven-Meriden, CT             | 398  | 10.5 | 27.2 | 2.62 (0.82, 8.37)    |

|     |                                      |      |      |      |                    |
|-----|--------------------------------------|------|------|------|--------------------|
| USA | New London, CT                       | 151  | 10.7 | 26.9 | 0.89 (0.13, 6.08)  |
| USA | New York, NY                         | 2642 | 13.5 | 30.3 | 1.23 (0.72, 2.10)  |
| USA | Newark, NJ                           | 393  | 13.1 | 30.3 | 2.65 (0.63, 11.18) |
| USA | Newburgh, NY                         | 125  | 9.7  | 25.6 | 0.23 (0.03, 1.67)  |
| USA | Oakland, CA                          | 1184 | 15.3 | 23.1 | 0.67 (0.38, 1.17)  |
| USA | Ocala, FL                            | 302  | 21.7 | 29.4 | 5.53 (0.93, 32.78) |
| USA | Oklahoma City, OK                    | 570  | 16.2 | 31.7 | 1.27 (0.40, 4.03)  |
| USA | Omaha, NE                            | 277  | 11.3 | 30.6 | 0.91 (0.21, 3.88)  |
| USA | Orange County, CA                    | 1376 | 18.7 | 27.5 | 1.15 (0.58, 2.26)  |
| USA | Orlando, FL                          | 851  | 22.7 | 29.7 | 1.44 (0.54, 3.82)  |
| USA | Pensacola, FL                        | 239  | 20.2 | 29.7 | 1.59 (0.27, 9.20)  |
| USA | Philadelphia, PA-NJ                  | 2580 | 13.6 | 30.0 | 0.94 (0.54, 1.65)  |
| USA | Phoenix, AZ                          | 2744 | 24.3 | 38.6 | 1.43 (0.87, 2.36)  |
| USA | Pittsburgh, PA                       | 868  | 11.0 | 25.8 | 1.93 (0.84, 4.44)  |
| USA | Portland, ME                         | 165  | 8.2  | 24.7 | 1.57 (0.19, 12.90) |
| USA | Portland, OR                         | 1132 | 12.7 | 25.8 | 0.97 (0.48, 1.98)  |
| USA | Providence-Fall River, RI-MA         | 116  | 11.1 | 28.6 | 0.60 (0.05, 7.57)  |
| USA | Punta Gorda, FL                      | 160  | 23.4 | 29.7 | 3.79 (0.57, 25.38) |
| USA | Raleigh, NC                          | 337  | 16.0 | 29.4 | 5.62 (0.89, 35.62) |
| USA | Reading, PA                          | 271  | 16.0 | 29.4 | 5.43 (0.96, 30.66) |
| USA | Riverside-San Bernardino, CA         | 2037 | 19.1 | 30.9 | 1.15 (0.68, 1.96)  |
| USA | Rochester, NY                        | 277  | 9.5  | 26.2 | 2.43 (0.47, 12.48) |
| USA | Rockford, IL                         | 173  | 9.8  | 27.8 | 0.47 (0.07, 3.14)  |
| USA | Sacramento, CA                       | 917  | 16.4 | 28.9 | 2.00 (0.98, 4.07)  |
| USA | Saginaw, MI                          | 125  | 8.7  | 26.7 | 2.73 (0.40, 18.81) |
| USA | Salinas, CA                          | 201  | 14.3 | 22.5 | 0.75 (0.20, 2.79)  |
| USA | Salt Lake City, UT                   | 805  | 11.9 | 29.2 | 1.16 (0.51, 2.60)  |
| USA | San Antonio, TX                      | 870  | 21.0 | 31.7 | 1.27 (0.51, 3.19)  |
| USA | San Diego, CA                        | 1758 | 17.6 | 25.0 | 1.67 (0.94, 2.97)  |
| USA | San Francisco, CA                    | 897  | 14.6 | 23.6 | 0.88 (0.45, 1.71)  |
| USA | San Jose, CA                         | 737  | 16.4 | 26.9 | 1.16 (0.54, 2.47)  |
| USA | Sarasota-Bradenton, FL               | 594  | 23.1 | 29.7 | 1.12 (0.39, 3.17)  |
| USA | Scranton--Wilkes-Barre--Hazleton, PA | 435  | 10.1 | 25.6 | 1.96 (0.71, 5.41)  |
| USA | Seattle, WA                          | 1189 | 11.4 | 23.3 | 0.96 (0.52, 1.77)  |
| USA | Shreveport, LA                       | 166  | 19.2 | 31.4 | 3.09 (0.30, 31.76) |
| USA | Spokane, WA                          | 396  | 9.0  | 25.6 | 1.49 (0.47, 4.72)  |



|         |                                     |      |      |      |                    |
|---------|-------------------------------------|------|------|------|--------------------|
| USA     | Springfield, MA                     | 212  | 10.5 | 28.1 | 5.81 (0.91, 37.12) |
| USA     | St. Louis, MO-IL                    | 1027 | 14.3 | 31.1 | 1.31 (0.55, 3.10)  |
| USA     | Stamford-Norwalk, CT                | 337  | 11.6 | 27.8 | 1.03 (0.16, 6.53)  |
| USA     | Stockton-Lodi, CA                   | 300  | 16.7 | 30.0 | 2.85 (0.77, 10.62) |
| USA     | Syracuse, NY                        | 201  | 9.5  | 27.0 | 4.70 (0.66, 33.47) |
| USA     | Tacoma, WA                          | 549  | 12.3 | 22.5 | 1.18 (0.45, 3.11)  |
| USA     | Tampa-St. Petersburg-Clearwater, FL | 811  | 23.0 | 30.0 | 0.96 (0.38, 2.44)  |
| USA     | Toledo, OH                          | 316  | 10.6 | 26.9 | 1.38 (0.41, 4.67)  |
| USA     | Trenton, NJ                         | 108  | 12.0 | 28.1 | 1.09 (0.14, 8.58)  |
| USA     | Tucson, AZ                          | 867  | 21.2 | 34.2 | 0.90 (0.38, 2.12)  |
| USA     | Tulsa, OK                           | 507  | 16.5 | 32.5 | 0.88 (0.32, 2.45)  |
| USA     | Utica-Rome, NY                      | 122  | 8.3  | 24.4 | 5.08 (0.40, 63.83) |
| USA     | Ventura County, CA                  | 445  | 16.0 | 23.3 | 4.71 (1.59, 13.94) |
| USA     | Virginia Beach, VA                  | 766  | 16.0 | 30.0 | 1.82 (0.72, 4.59)  |
| USA     | Washington, DC-MD-VA                | 244  | 14.6 | 30.3 | 2.71 (0.50, 14.55) |
| USA     | West Palm Beach-Boca Raton, FL      | 921  | 24.3 | 30.0 | 1.18 (0.48, 2.92)  |
| USA     | Wichita, KS                         | 334  | 14.4 | 31.9 | 0.86 (0.23, 3.27)  |
| USA     | Wilmington, DE                      | 311  | 12.7 | 28.9 | 1.76 (0.40, 7.72)  |
| USA     | Worcester, MA                       | 319  | 9.2  | 24.7 | 1.34 (0.37, 4.83)  |
| USA     | York, PA                            | 264  | 12.5 | 27.5 | 4.05 (0.77, 21.46) |
| USA     | Youngstown-Warren, OH               | 258  | 9.8  | 24.8 | 1.00 (0.29, 3.44)  |
| Vietnam | Ho Chi Minh City                    | 460  | 28.5 | 30.0 | 1.73 (0.98, 3.04)  |

---

**Table S3.** P-values of the LRT (log-likelihood ratio test) between linear and nonlinear models with different number of internal knots of the distributed lag nonlinear function for temperature.

| Level                | Name of locations               | Linear vs. | Linear vs. | Linear vs. |
|----------------------|---------------------------------|------------|------------|------------|
|                      |                                 | 1 knot     | 2 knots    | 3 knots    |
| Overall              |                                 | <0.001*    | <0.001*    | <0.001*    |
| Regional             | Western countries <sup>a</sup>  | 0.195      | 0.359      | 0.114      |
|                      | Eastern countries <sup>b</sup>  | <0.001*    | <0.001*    | <0.001*    |
| Country              | Brazil                          | 0.156      | 0.447      | 0.258      |
|                      | Canada                          | 0.175      | 0.174      | 0.020*     |
|                      | Japan                           | <0.001*    | <0.001*    | <0.001*    |
|                      | South Korea                     | 0.454      | 0.082      | 0.031*     |
|                      | Philippines                     | 0.374      | 0.442      | 0.274      |
|                      | South Africa                    | 0.482      | 0.591      | 0.836      |
|                      | Spain                           | 0.757      | 0.501      | 0.217      |
|                      | Switzerland                     | 0.717      | 0.904      | 0.701      |
|                      | Taiwan                          | 0.381      | 0.370      | 0.183      |
|                      | UK                              | 0.684      | 0.702      | 0.563      |
|                      | USA                             | 0.110      | 0.242      | 0.194      |
|                      | Vietnam                         | 0.331      | 0.412      | 0.429      |
| Capital <sup>c</sup> | Sao Paulo, Brazil               | 0.860      | 0.679      | 0.618      |
|                      | Toronto, Canada                 | 0.915      | 0.389      | 0.594      |
|                      | Tokyo, Japan                    | 0.008*     | 0.002*     | 0.017*     |
|                      | Seoul, South Korea              | 0.146      | 0.002*     | 0.002*     |
|                      | Manila, Philippines             | 0.637      | 0.782      | 0.622      |
|                      | City of Cape Town, South Africa | 0.928      | 0.513      | 0.364      |
|                      | Barcelona, Spain                | 0.885      | 0.522      | 0.419      |
|                      | Zurich, Switzerland             | 0.205      | 0.385      | 0.609      |
|                      | Taipei, Taiwan                  | 0.075      | 0.160      | 0.039*     |
|                      | South East, UK                  | 0.085      | 0.160      | 0.313      |
|                      | Los Angeles, CA, USA            | 0.201      | 0.393      | 0.559      |
|                      | Ho Chi Minh City, Vietnam       | 0.331      | 0.412      | 0.429      |

<sup>a</sup> Brazil, Canada, South Africa, Spain, Switzerland, UK, and US; <sup>b</sup> Japan, South Korea, Philippines, Taiwan, and Vietnam; <sup>c</sup> Location where the total number of suicides was the largest for each country;

\*<0.05

**Table S4.** Random-effects meta-regression models in the second-stage analysis.

| Model                   | Predictor                       | Test for predictor <sup>a</sup> | Q-test <sup>b</sup> | I <sup>2</sup> |
|-------------------------|---------------------------------|---------------------------------|---------------------|----------------|
| <b>Intercept only</b>   | -                               | -                               | 0.158               | 3.3%           |
| <b>Single predictor</b> | Temperature range               | 0.204                           | 0.181               | 3.0%           |
|                         | Summer temperature <sup>c</sup> | <0.001                          | 0.221               | 2.6%           |
|                         | Country                         | <0.001                          | 0.585               | 1.0%           |
| <b>Two predictors</b>   | Temperature range               | 0.203                           | 0.252               | 2.2%           |
|                         | Summer temperature <sup>c</sup> | 0.001                           |                     |                |
| <b>Full model</b>       | Temperature range               | 0.449                           | 0.590               | 1.0%           |
|                         | Summer temperature <sup>c</sup> | 0.395                           |                     |                |
|                         | Country                         | <0.001                          |                     |                |

<sup>a</sup>*p*-value for the multivariate Wald test for the significance of the meta predictors.

<sup>b</sup>*p*-value for the Cochran Q-test.

<sup>c</sup>Summer temperature was defined as the average of daily ambient temperature during June to September in the countries in Northern Hemisphere and during December to March in the countries in Southern Hemisphere.

**Table S5.** Country-specific minimum suicide temperature (°C) (MinST) and maximum suicide temperature (°C) (MaxST) and pooled lag-cumulative relative risks (RRs) with 95% confidence intervals (CIs) by country in subgroup analyses by sex and age groups (young, < 65 years of age; elder, ≥ 65 years of age) using a conditional Poisson model adjusting for seasonality, long-term time trend, and the day-of-week.

|              | <b>MinST<sup>a</sup></b> | <b>MaxST<sup>a</sup></b> | <b>Total<sup>b</sup></b> | <b>Men<sup>b</sup></b> | <b>Women<sup>b</sup></b> | <b>Young<sup>b</sup></b> | <b>Elder<sup>b</sup></b> |
|--------------|--------------------------|--------------------------|--------------------------|------------------------|--------------------------|--------------------------|--------------------------|
| Brazil       | 21.4                     | 24.8                     | 1.15 (1.02–1.30)         | 1.10 (0.96-1.26)       | 1.33 (1.04-1.69)         | NA                       | NA                       |
| Canada       | -15.3                    | 24.2                     | 1.46 (1.26–1.70)         | 1.50 (1.26-1.78)       | 1.43 (1.06-1.93)         | 1.43 (1.22-1.68)         | 1.55 (1.02-2.33)         |
| Japan        | 0.4                      | 25.5                     | 1.37 (1.32–1.41)         | 1.32 (1.27-1.38)       | 1.45 (1.37-1.52)         | 1.26 (1.22-1.31)         | 1.68 (1.59-1.79)         |
| South Korea  | -5.2                     | 25.0                     | 1.61 (1.46–1.78)         | 1.59 (1.40-1.81)       | 1.62 (1.37-1.92)         | 1.50 (1.35-1.67)         | 2.20 (1.77-2.73)         |
| Philippines  | 26.0                     | 28.2                     | 1.14 (0.84–1.55)         | 1.04 (0.73-1.49)       | 1.29 (0.73-2.26)         | NA                       | NA                       |
| South Africa | 7.6                      | 26.4                     | 1.79 (1.30–2.46)         | 1.74 (1.18-2.55)       | 1.90 (0.91-3.96)         | NA                       | NA                       |
| Spain        | 3.7                      | 27.8                     | 1.49 (1.27–1.76)         | 1.57 (1.29-1.92)       | 1.30 (0.97-1.76)         | 1.40 (1.15-1.71)         | 1.62 (1.22-2.16)         |
| Switzerland  | -4.7                     | 24.6                     | 1.47 (1.21–1.78)         | 1.46 (1.15-1.84)       | 1.52 (1.08-2.14)         | 1.48 (1.17-1.87)         | 1.42 (1.02-1.97)         |
| Taiwan       | 13.1                     | 29.2                     | 1.65 (1.40–1.93)         | 1.56 (1.27-1.91)       | 1.88 (1.42-2.49)         | 1.71 (1.44-2.04)         | 1.39 (0.99-1.94)         |
| UK           | -0.7                     | 20.7                     | 1.34 (1.22–1.46)         | 1.39 (1.25-1.54)       | 1.20 (1-10.44)           | 1.34 (1.22-1.47)         | 1.33 (1.07-1.64)         |
| USA          | -3.6                     | 28.8                     | 1.31 (1.19–1.44)         | 1.29 (1.15-1.44)       | 1.15 (0.94-1.42)         | 1.21 (1.08-1.35)         | 1.54 (1.20-1.97)         |
| Vietnam      | 26.5                     | 30.0                     | 1.73 (0.98–3.05)         | 1.74 (0.91-3.34)       | 1.57 (0.55-4.46)         | NA                       | NA                       |

<sup>a</sup>Median values of the location-specific MinST and MaxST, respectively.

<sup>b</sup>RR (95% CI) for MaxST vs. MinST. All 341 locations were included for total. The subgroup analyses included 245 locations for sex and 206 locations for age groups because of the low numbers of suicide cases in women and older adults in small cities/regions. Data not shown (NA: not applicable) for age groups in Brazil, the Philippines, South Africa, and Vietnam, where the results were highly unstable due to the low suicide cases.

(A)

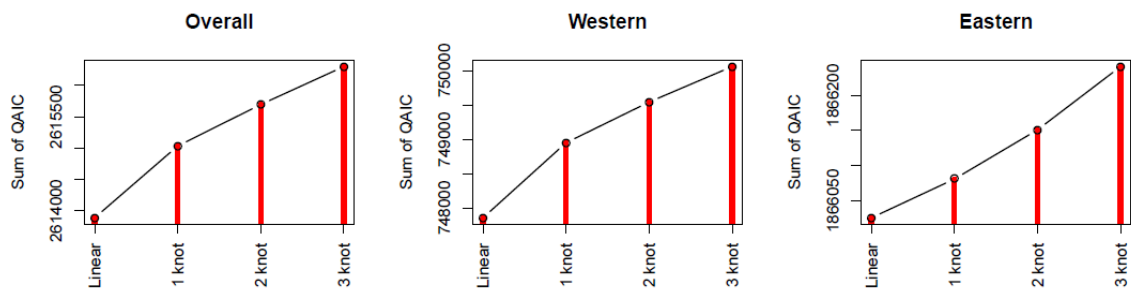

**Figure S1.** Quasi-Akaike Information Criteria (AIC modified with overdispersion) between linear and nonlinear models using a quadratic B-spline with one to three internal knots for the temperature-suicide association (A) pooled across all locations, locations in western countries (Brazil, Canada, South Africa, Spain, Switzerland, UK, and US), and locations in eastern countries (Japan, South Korea, Philippines, Taiwan, and Vietnam), (B) pooled for each country, and (C) in capital cities/regions where the number of suicides was largest for each country. BR, Brazil; CA, Canada; JP, Japan; KR, South Korea; PH, the Philippines; SA, South Africa; SP, Spain; SW, Switzerland; TW, Taiwan; UK, the UK; US, the United States; VN, Vietnam.

(B)

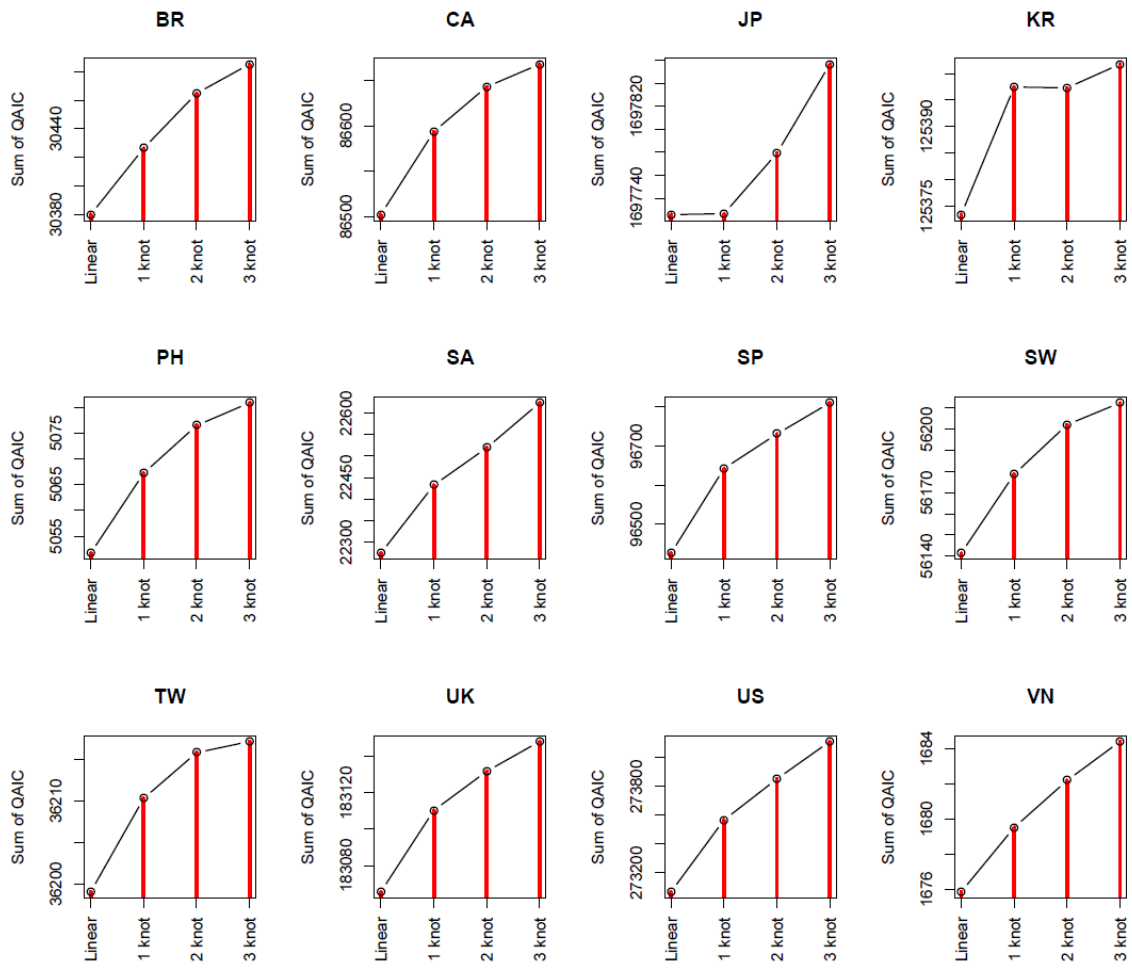

Figure S1. (continued).

(C)

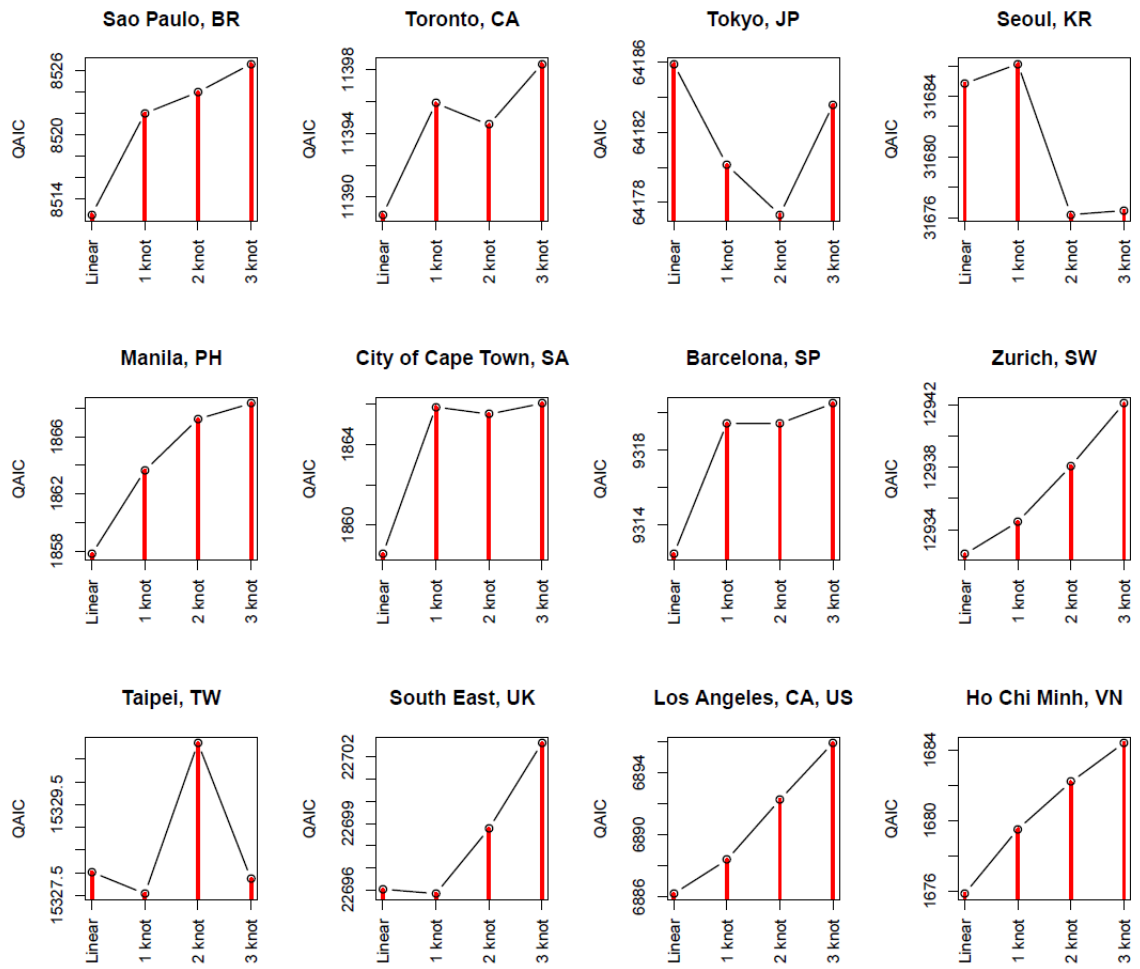

Figure S1. (continued).

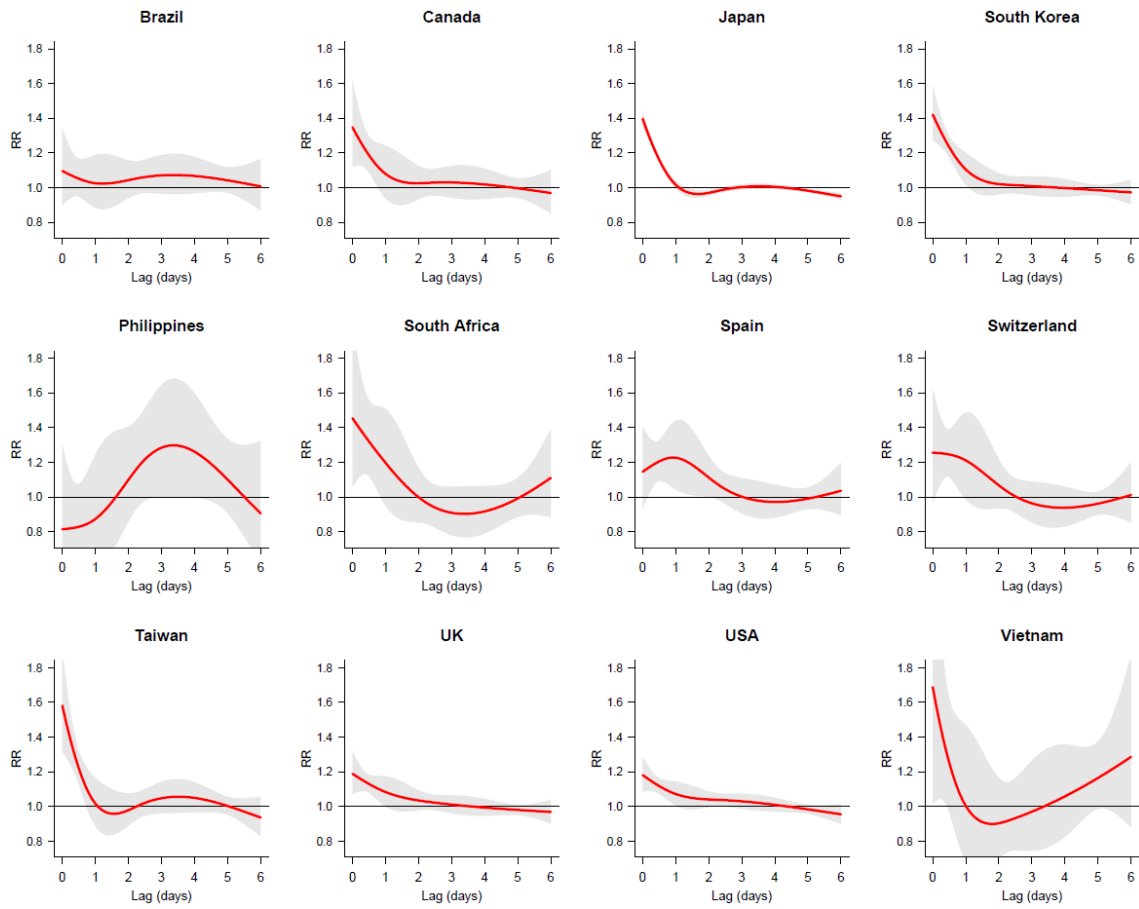

**Figure S2.** Country-specific lag-response associations for maximum suicide temperature (MaxST) vs. minimum suicide temperature (MinST) over the extended lags of up to 6 days (with 95% confidence interval, shaded grey) using a conditional Poisson model adjusting for seasonality, long-term time trend, and the day-of-week. RR, relative risk.



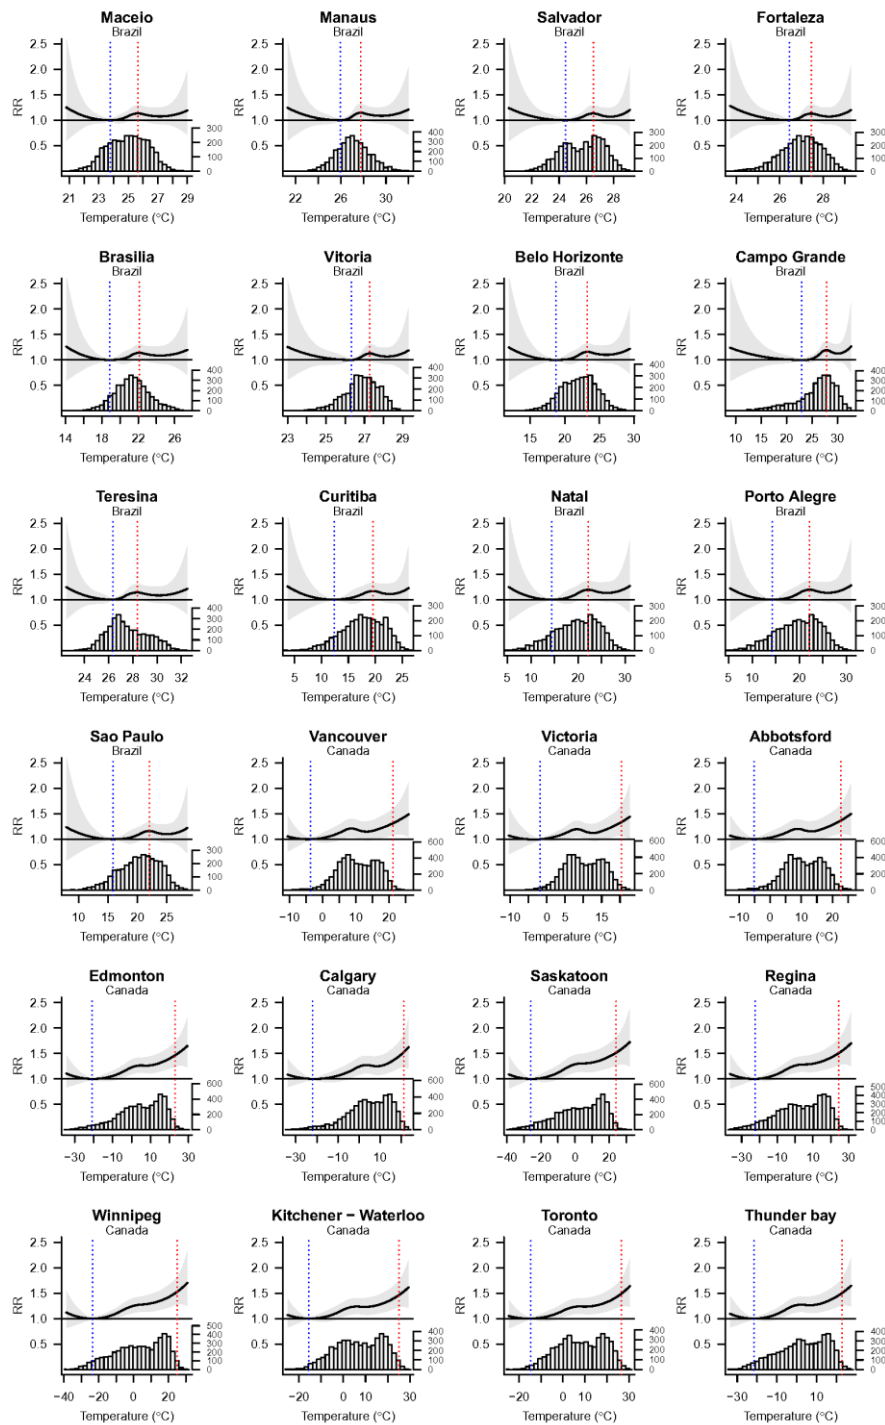

**Figure S3.** Location-specific lag-cumulative temperature-suicide associations as the best linear unbiased prediction (BLUP) (with 95% CIs, shaded grey) and the corresponding temperature distributions. The temperature-suicide associations were estimated by using a conditional Poisson model adjusting for seasonality, long-term time trend, and the day of week. The blue and red vertical dotted lines indicate the minimum suicide temperature and maximum suicide temperature, respectively. CI, confidence interval; RR, relative risk.

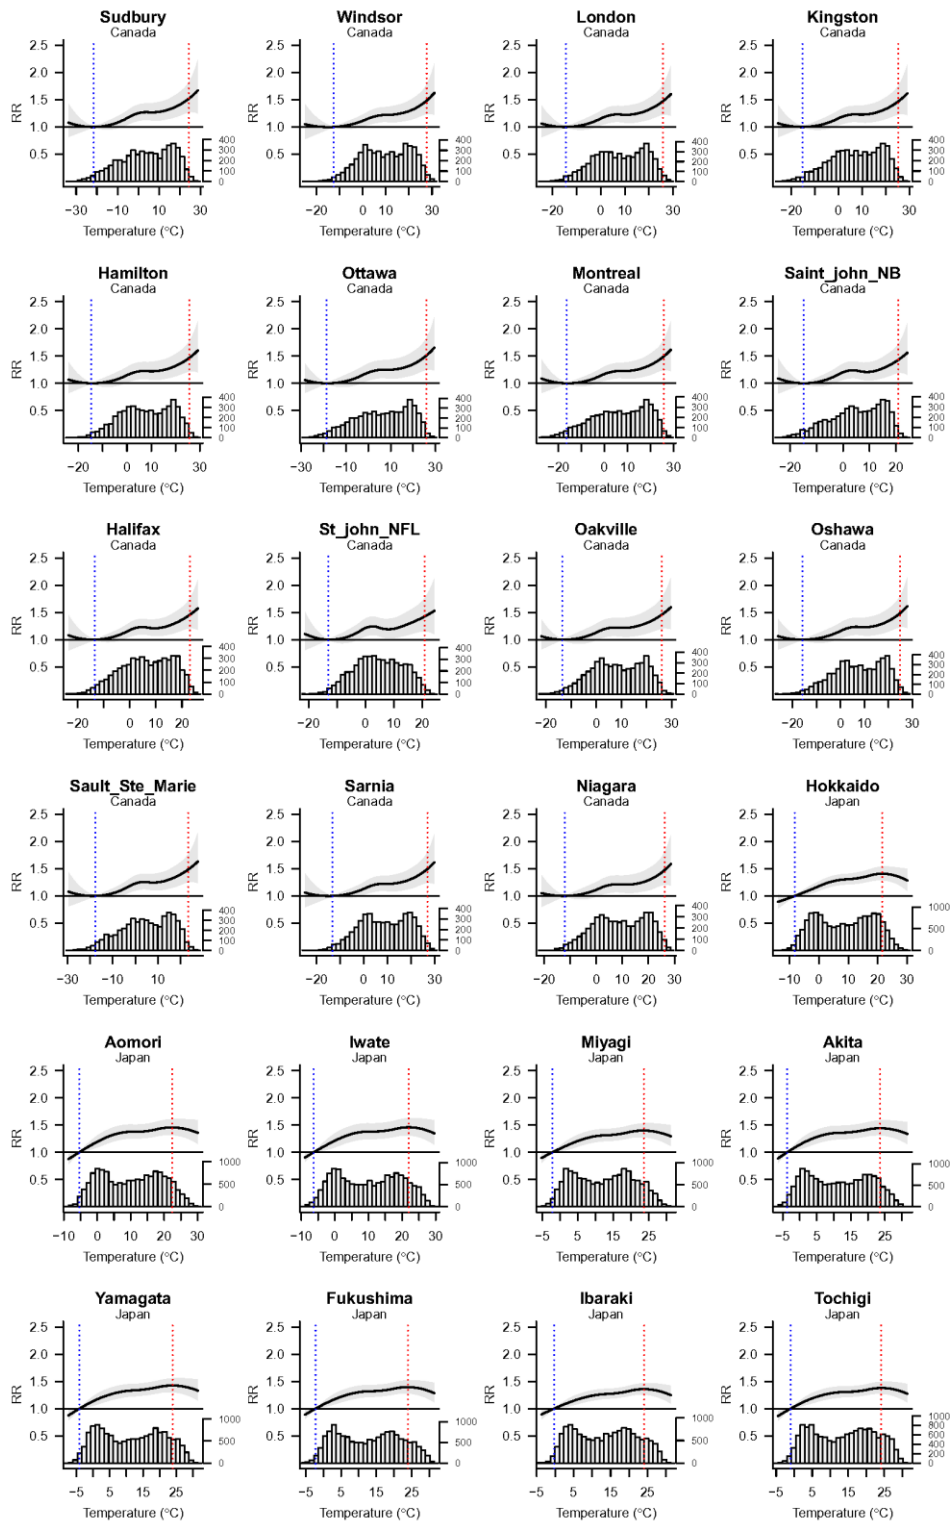

Figure S3. (Continued).

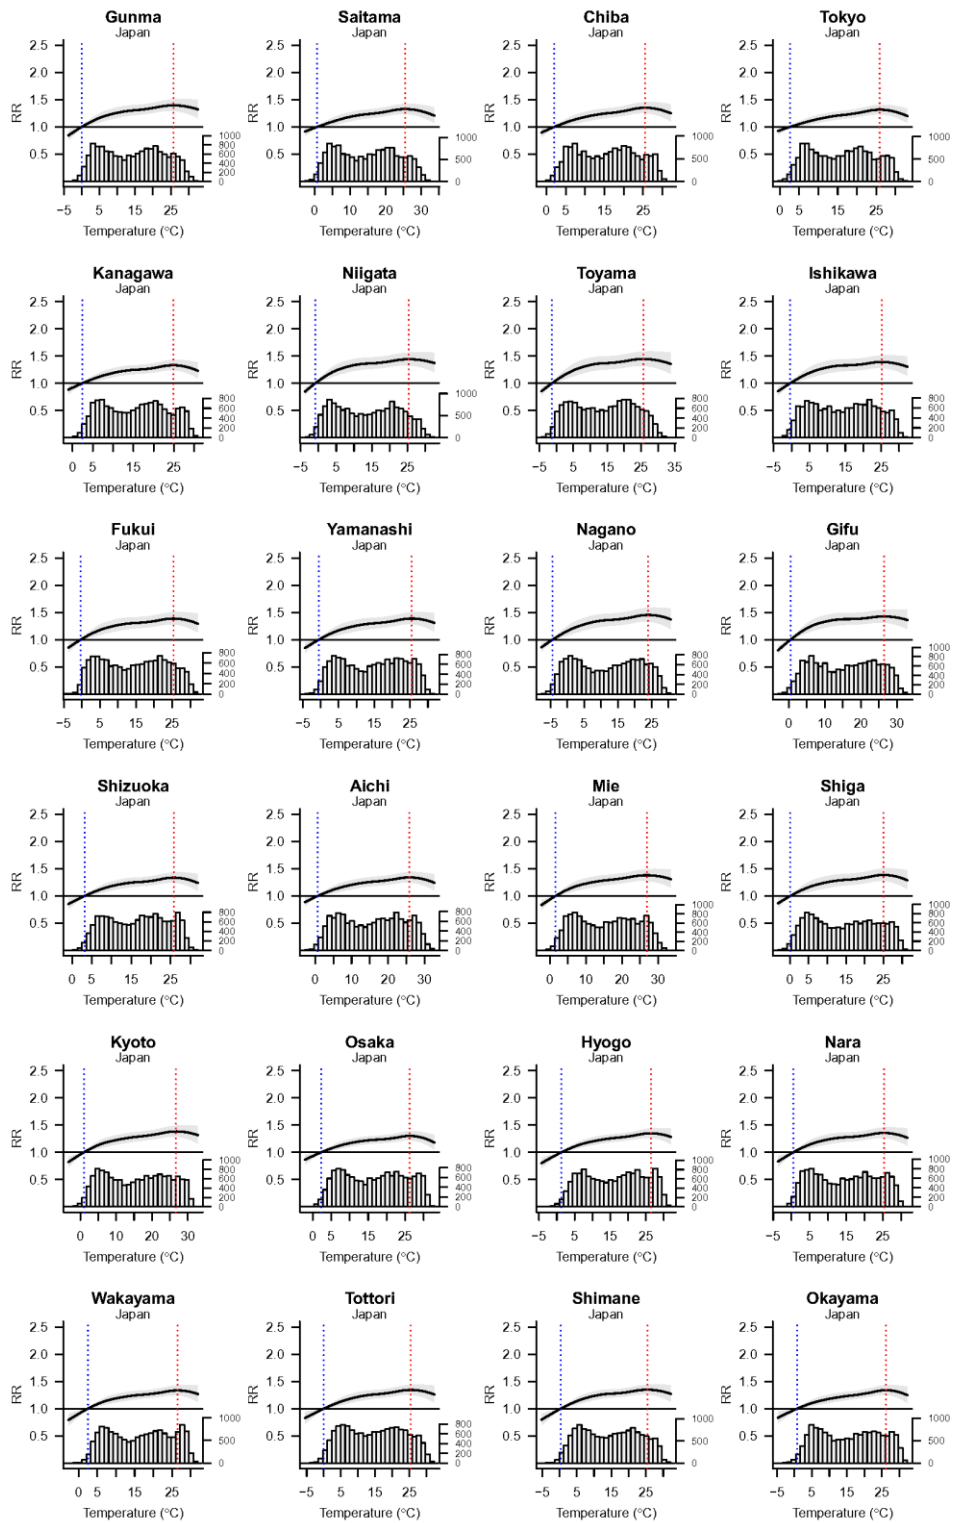

Figure S3. (Continued).

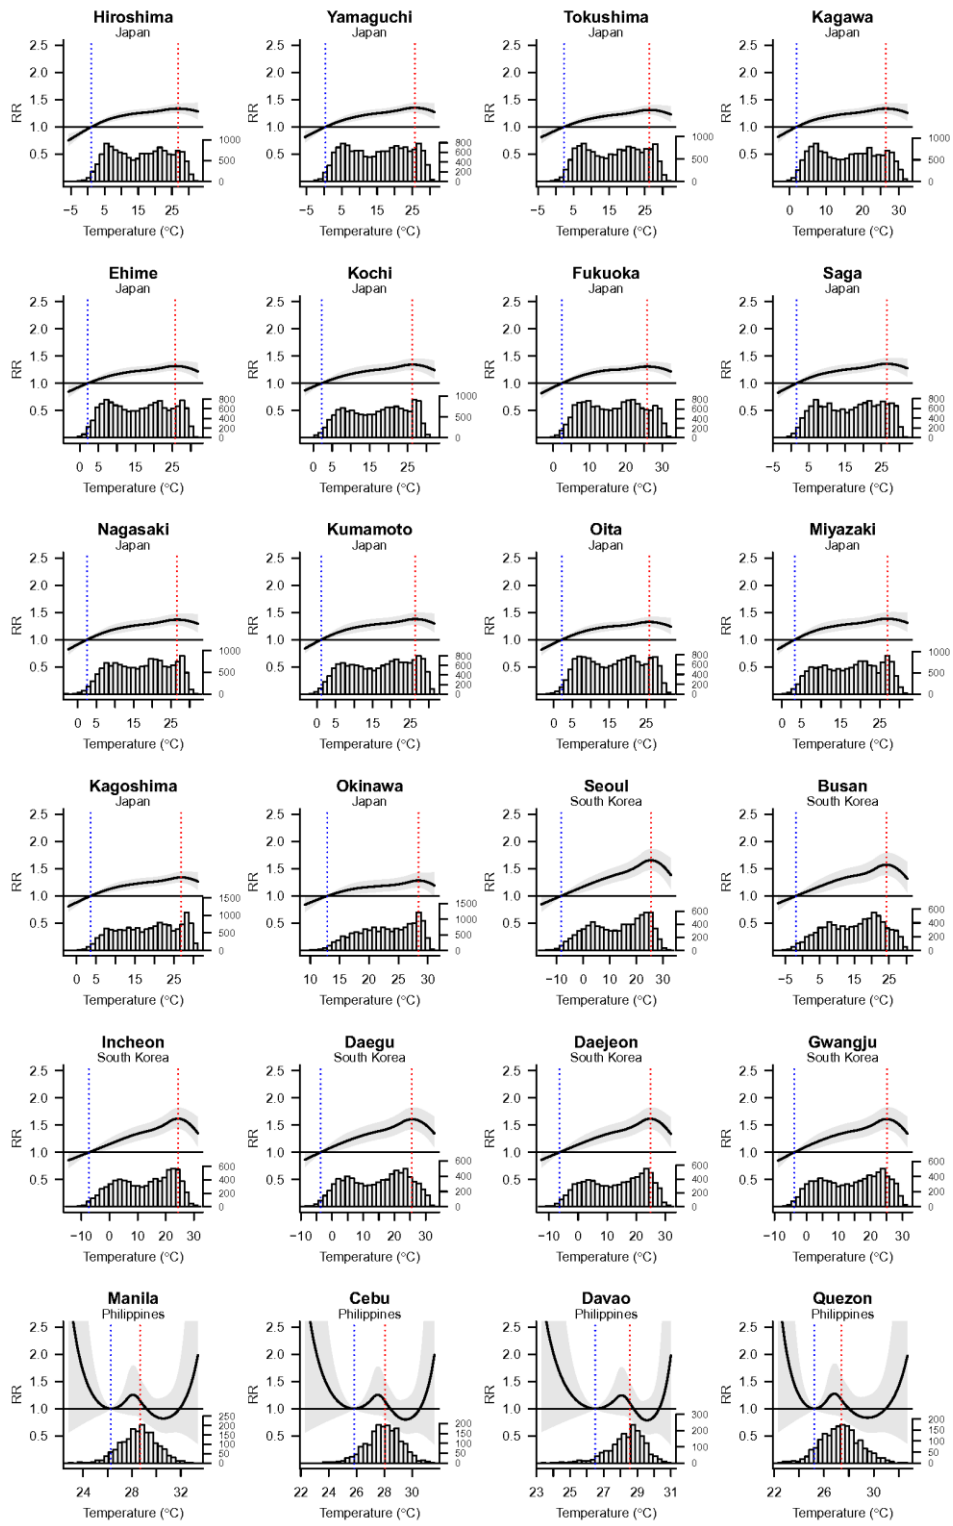

Figure S3. (Continued).

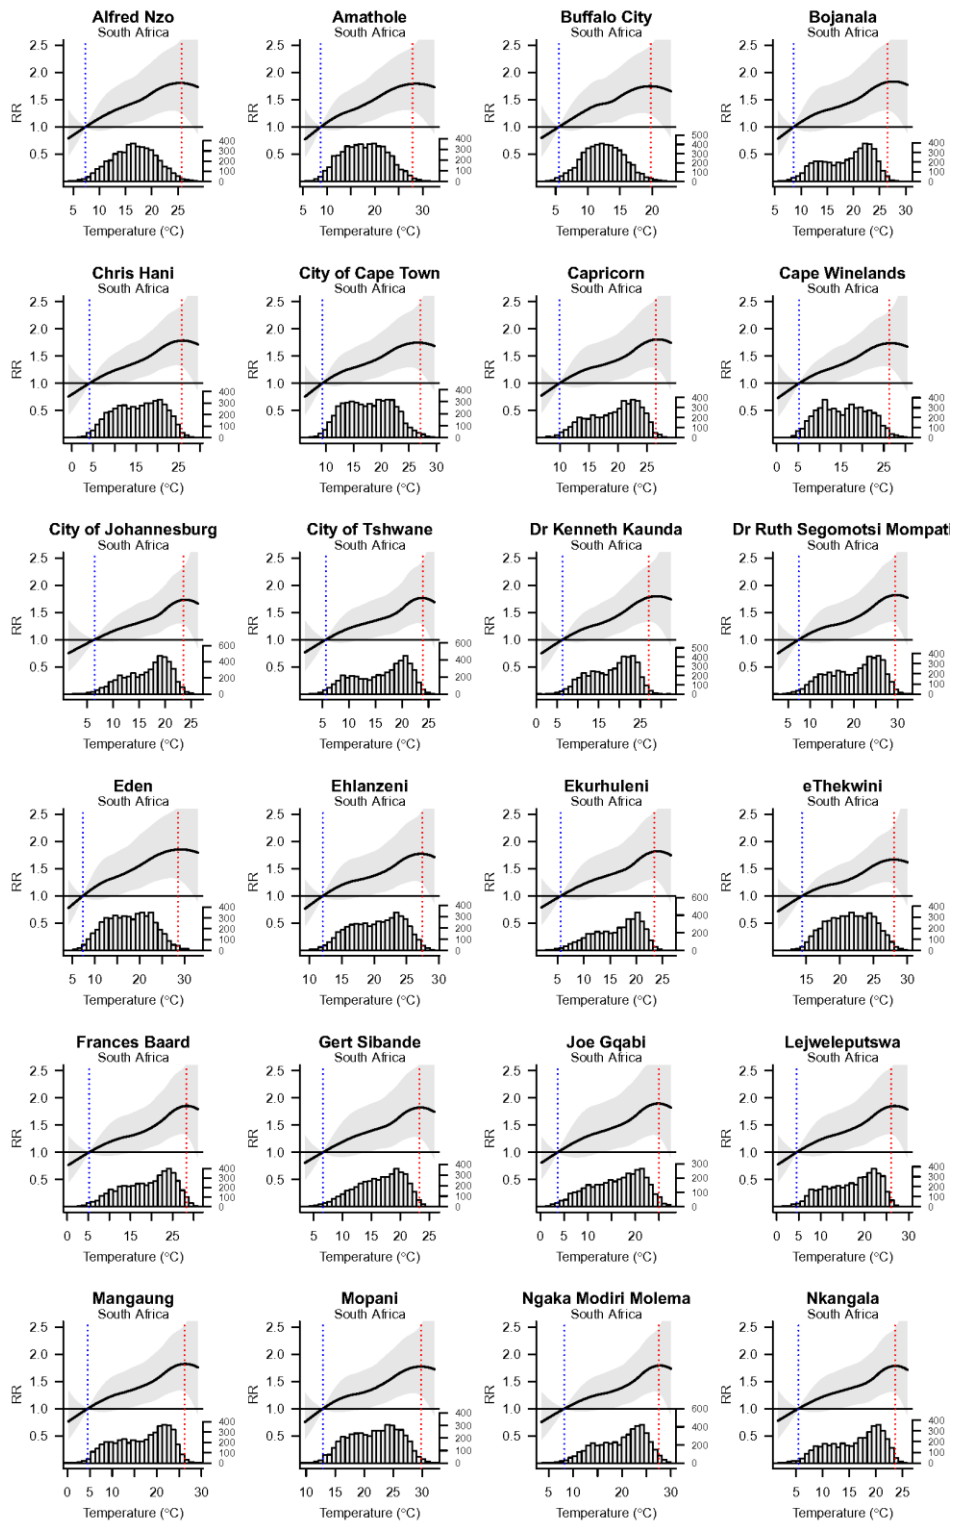

Figure S3. (Continued).

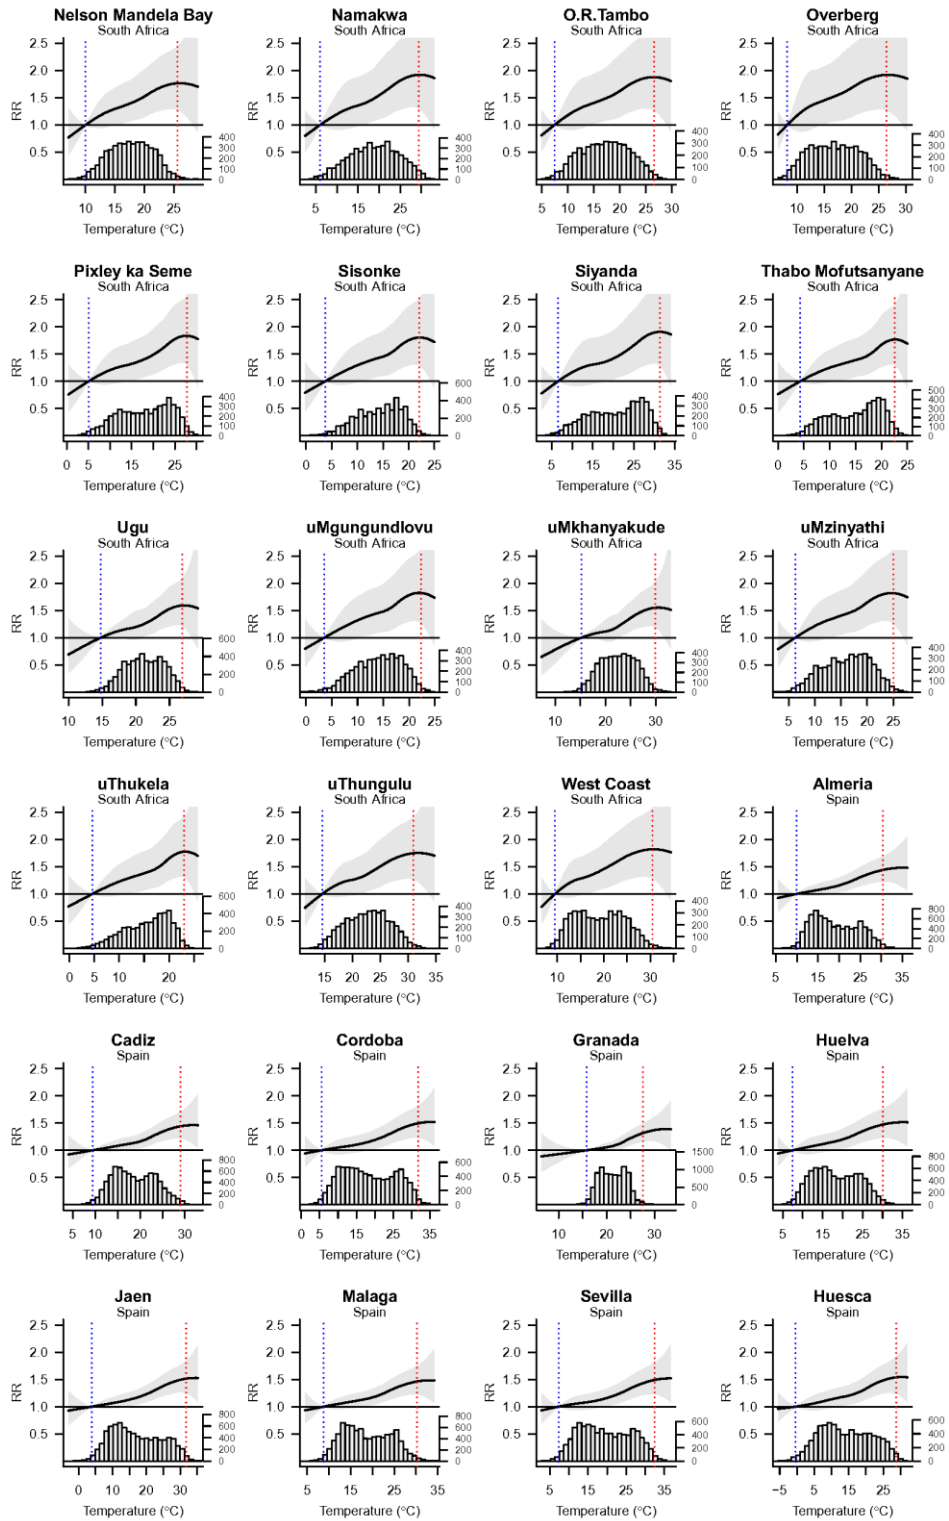

Figure S3. (Continued).

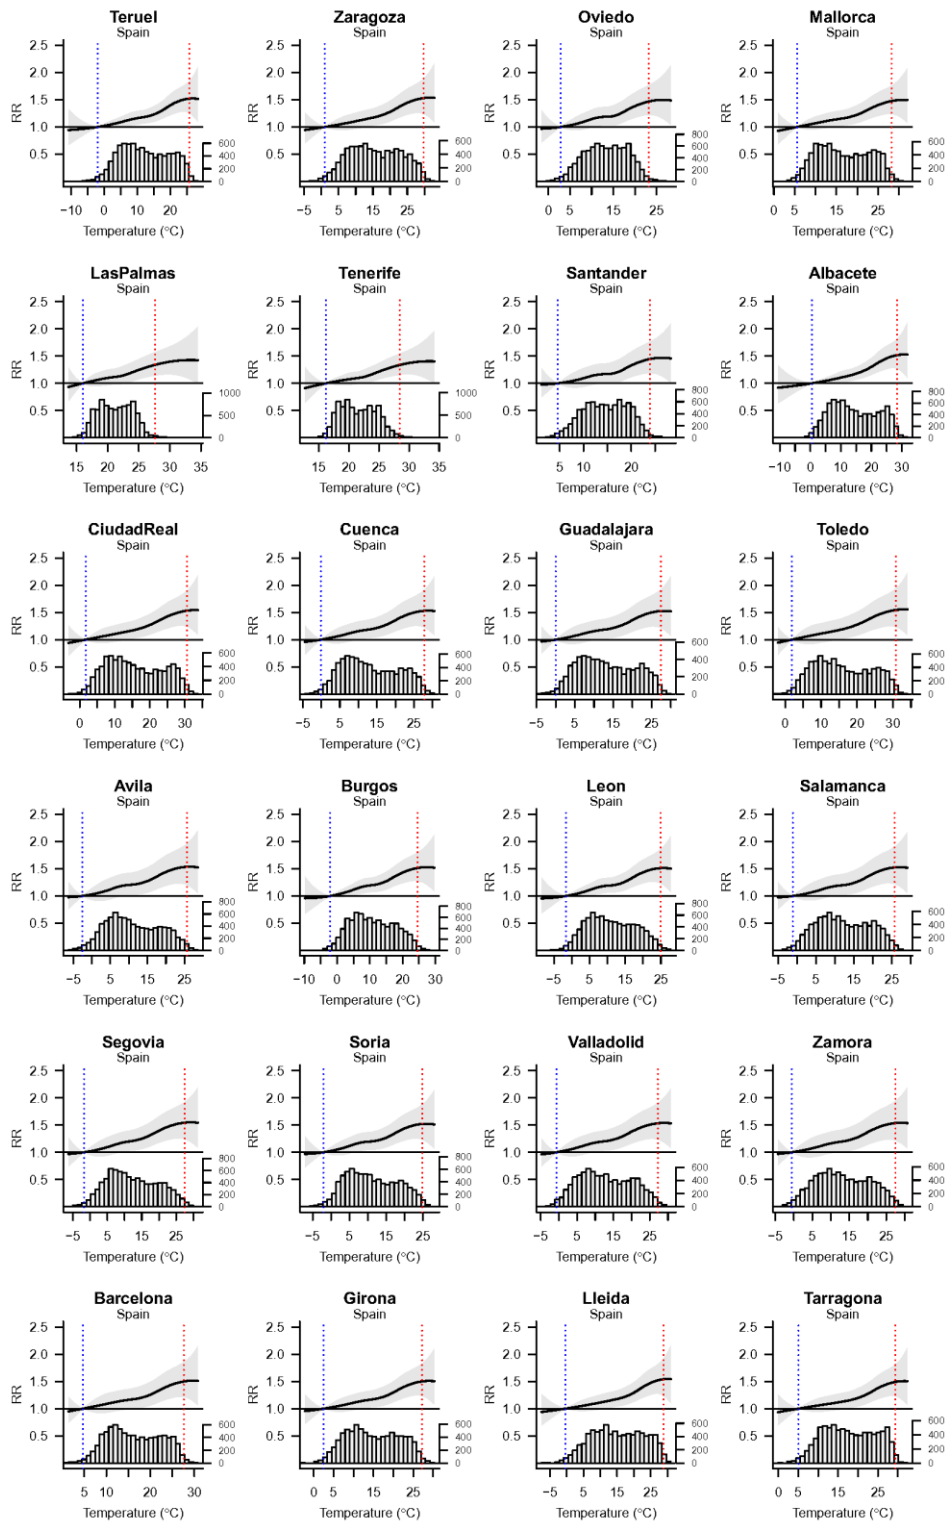

Figure S3. (Continued).

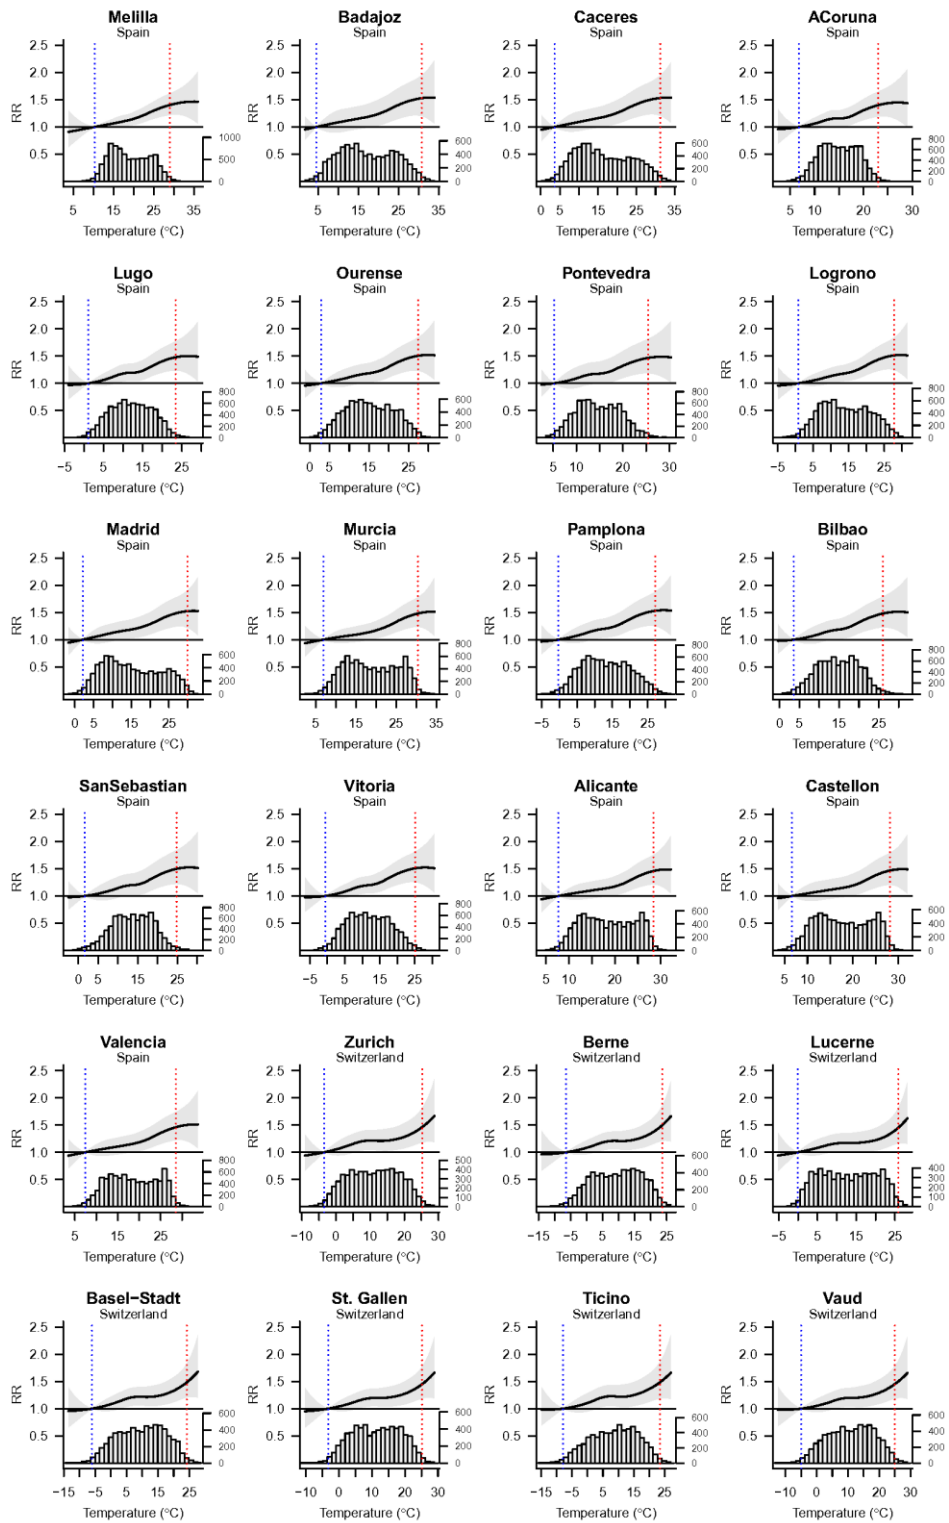

Figure S3. (Continued).



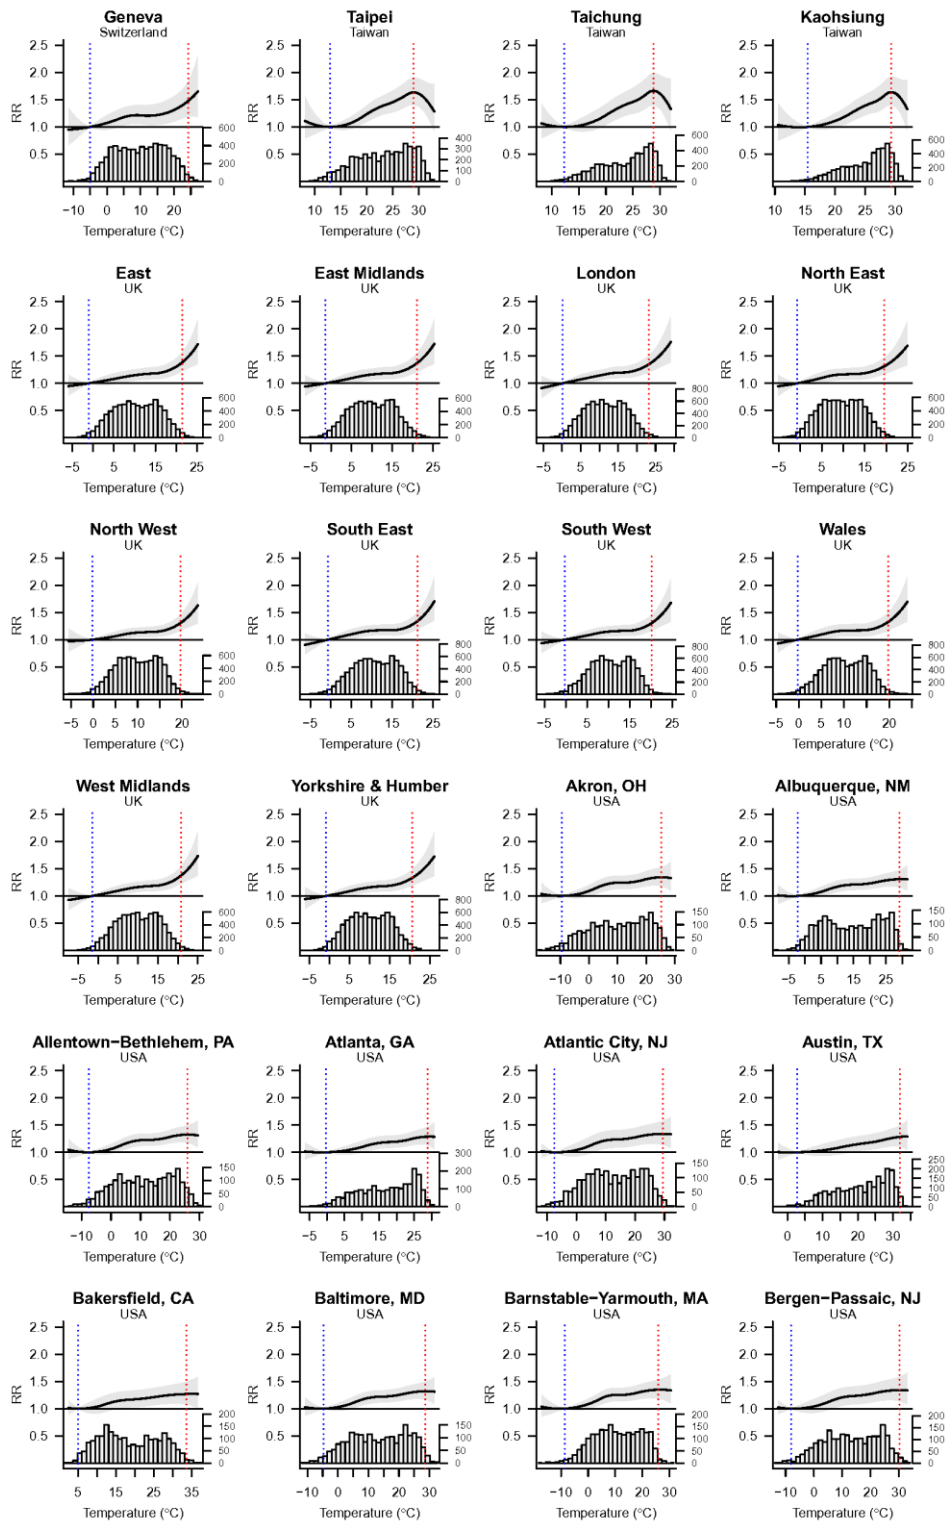

Figure S3. (Continued).

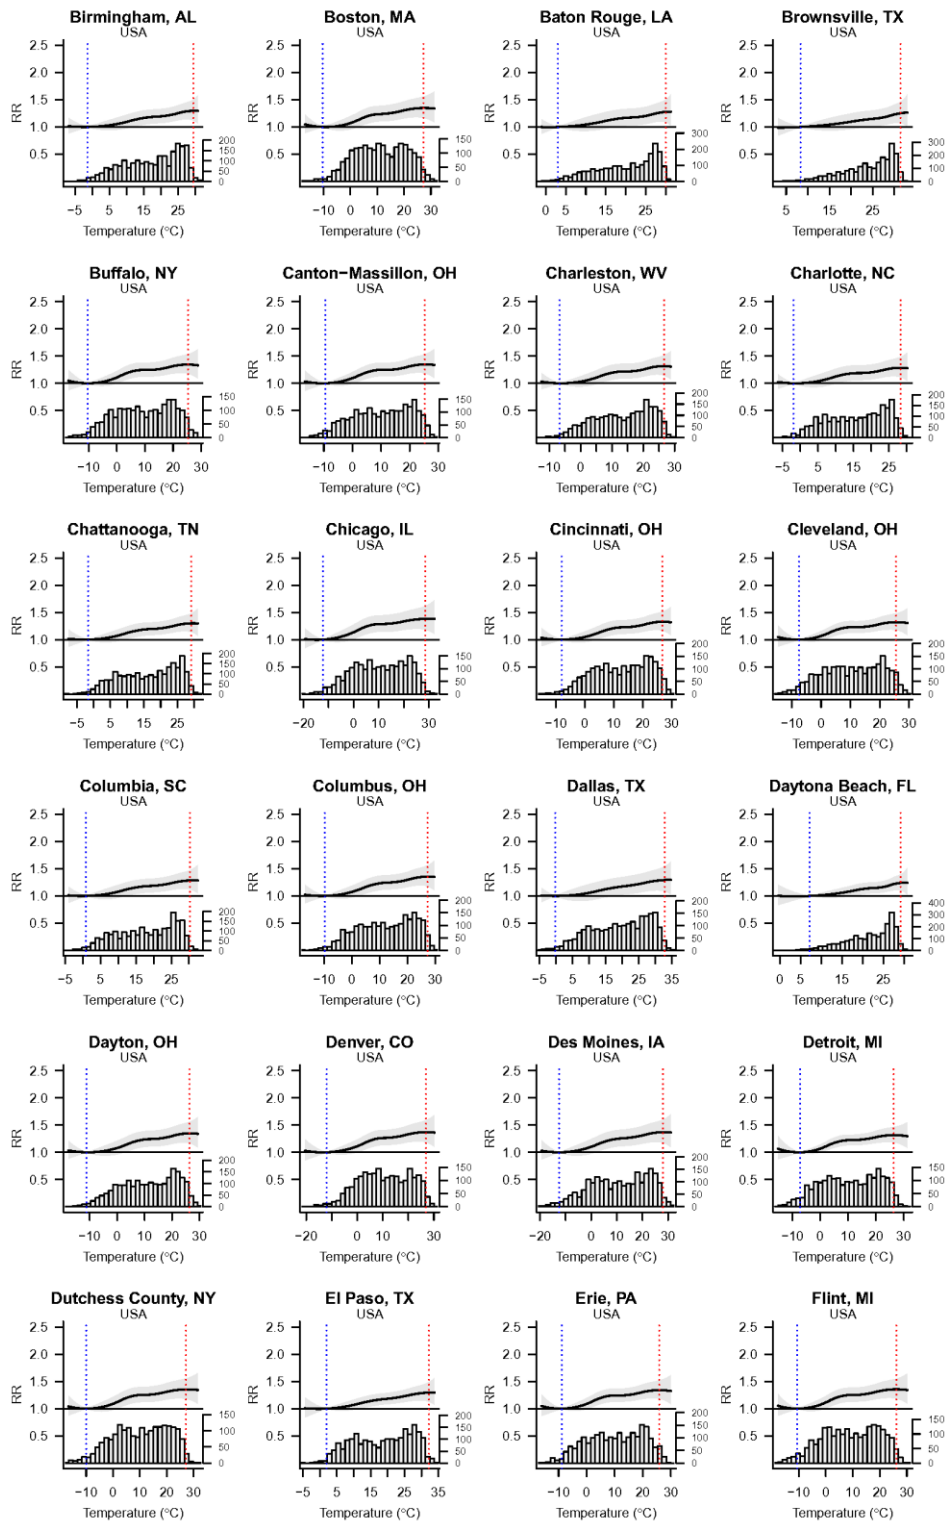

Figure S3. (Continued).

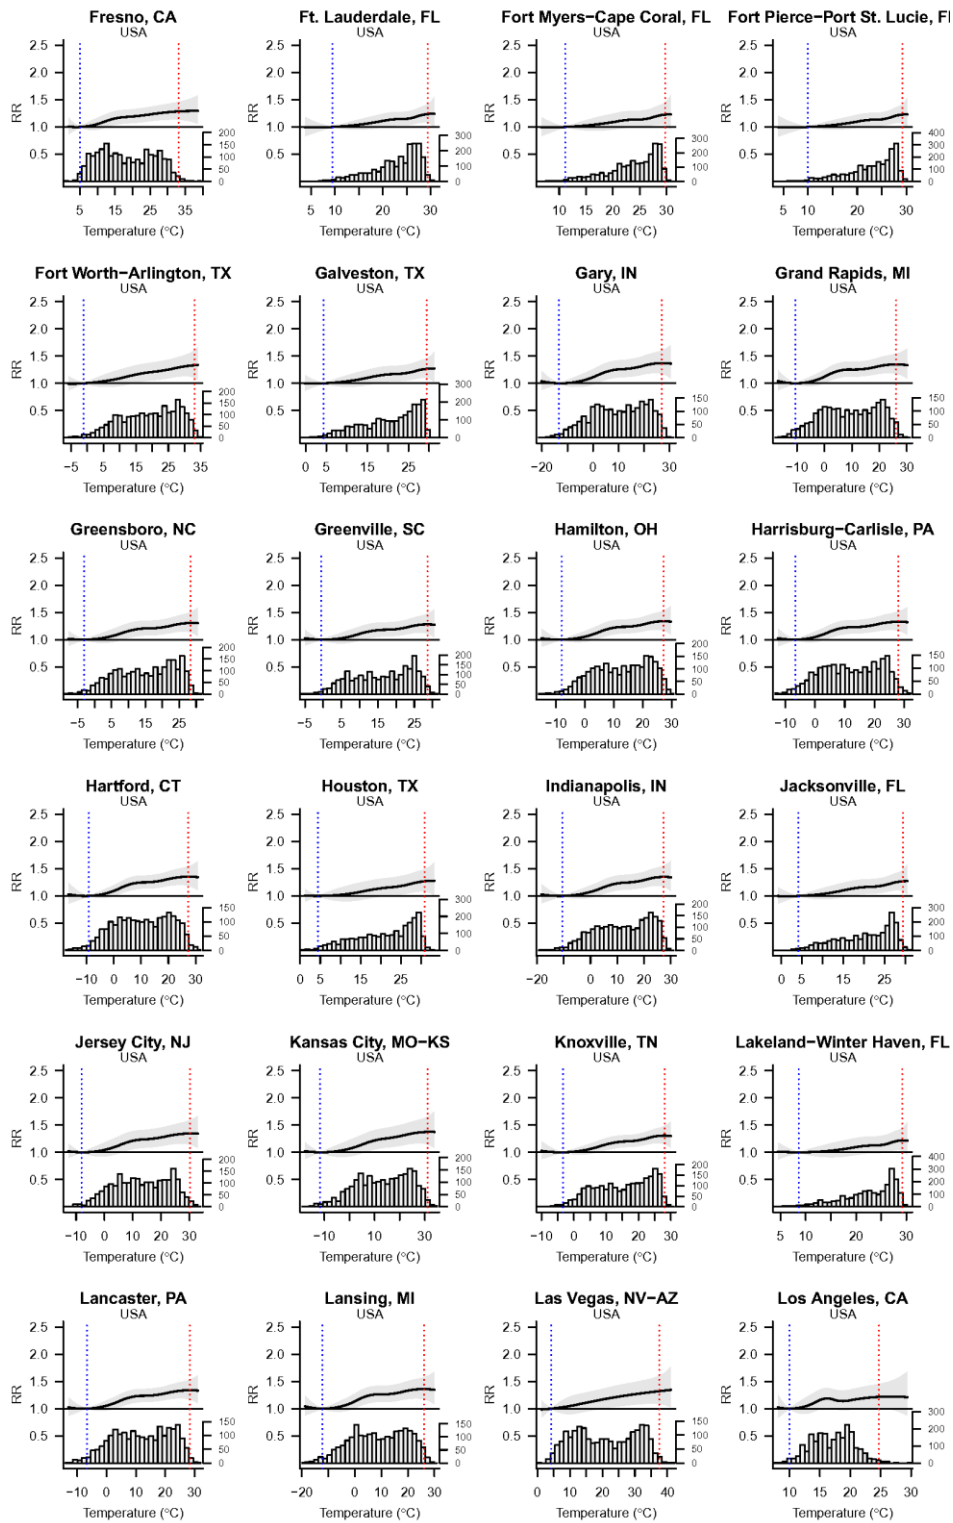

Figure S3. (Continued).

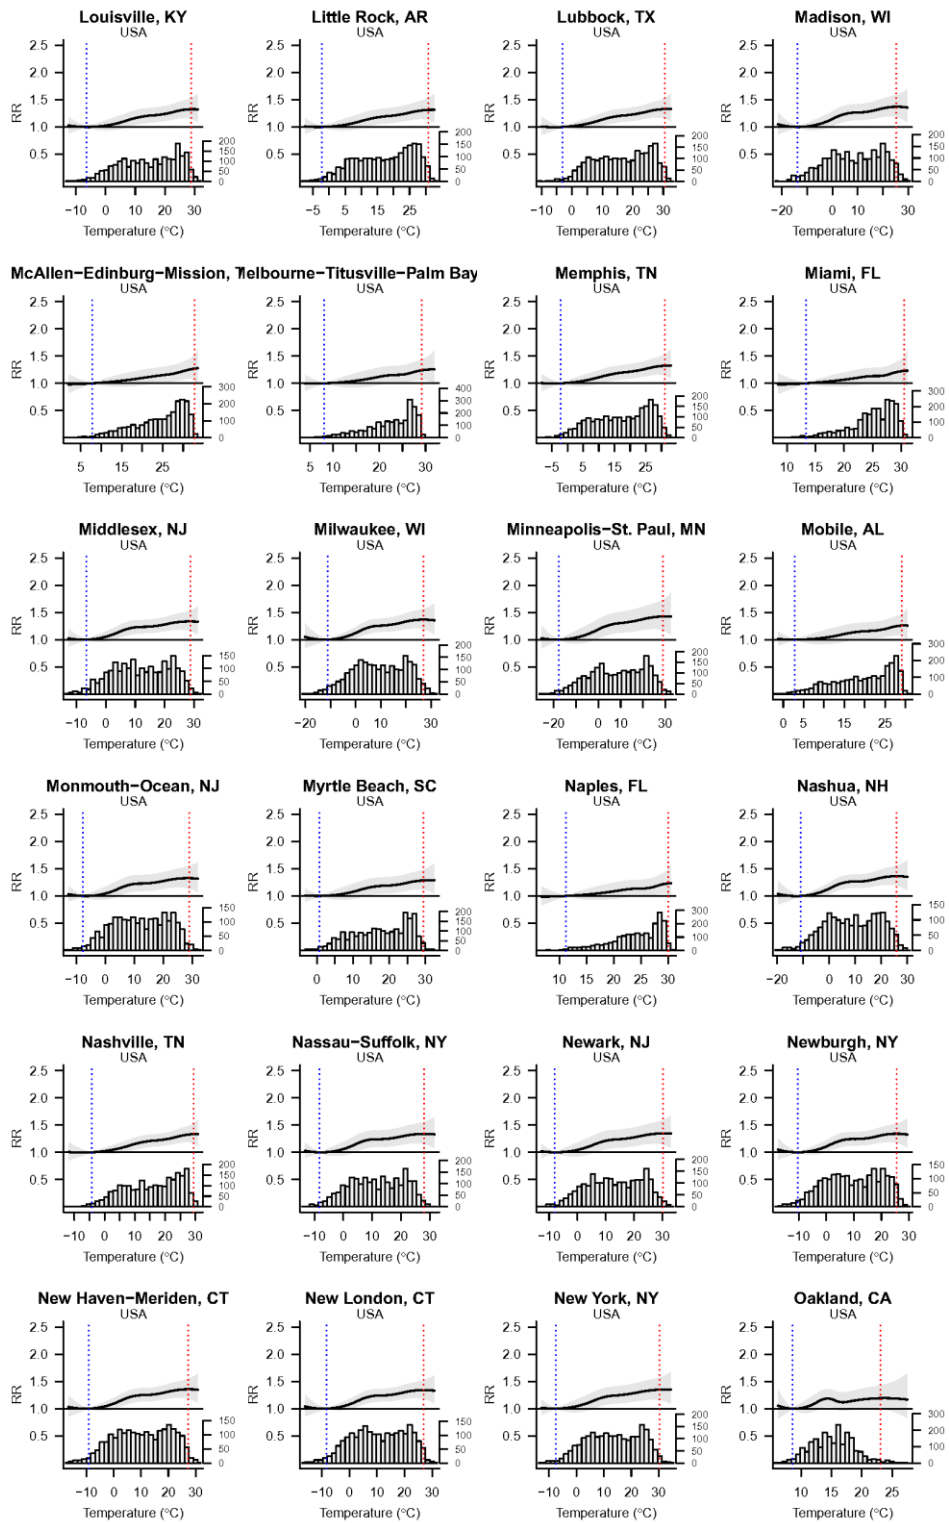

Figure S3. (Continued).

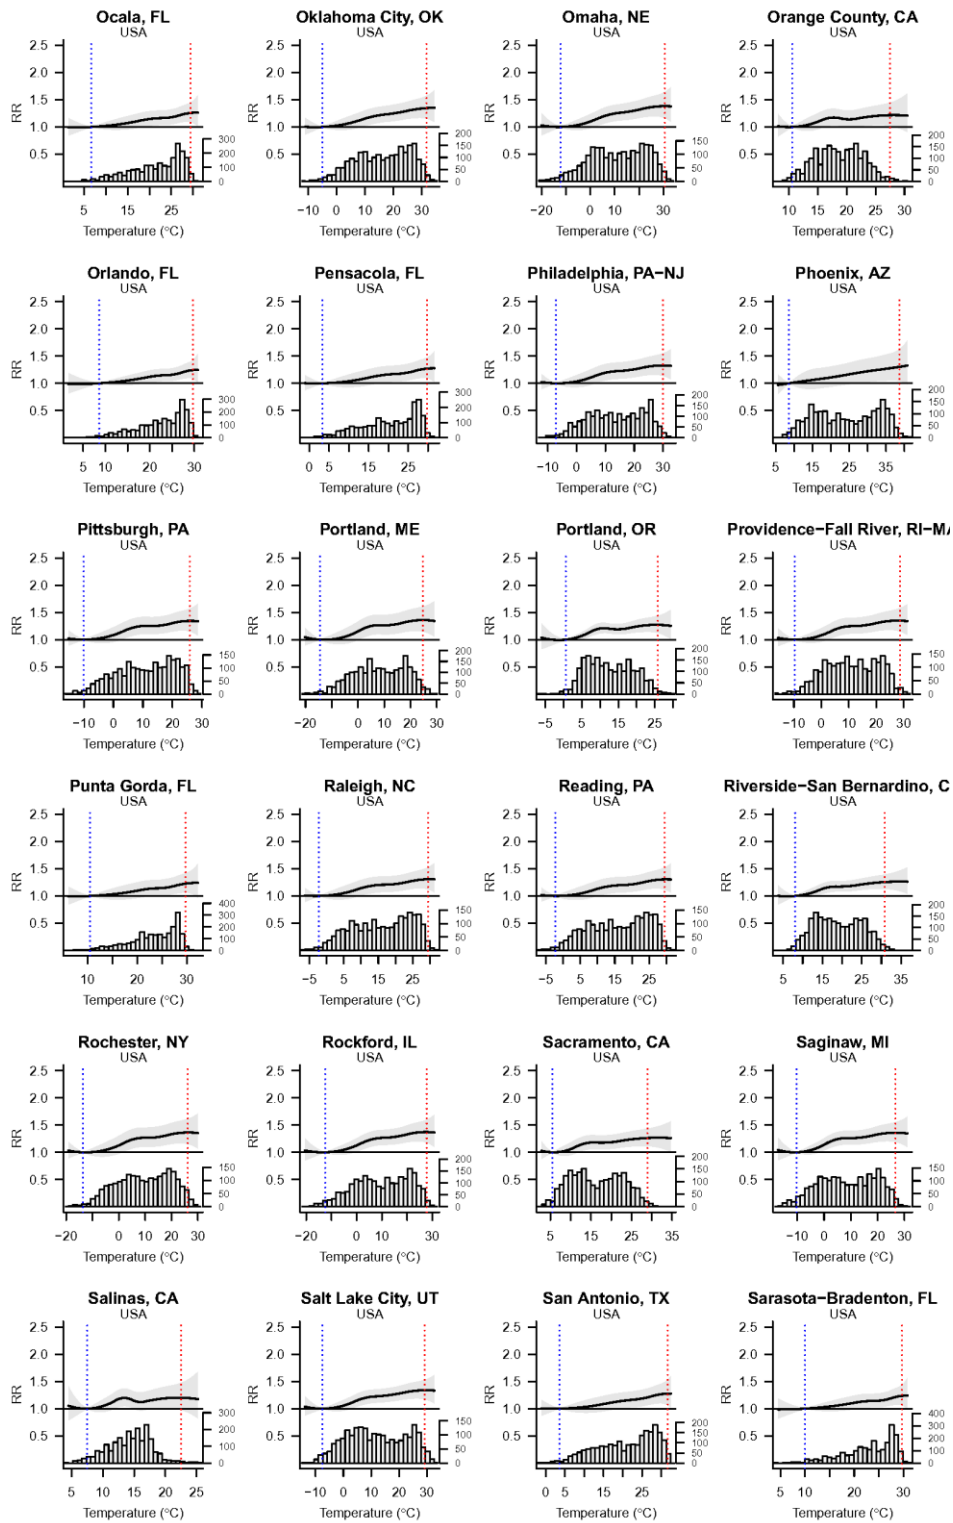

Figure S3. (Continued).

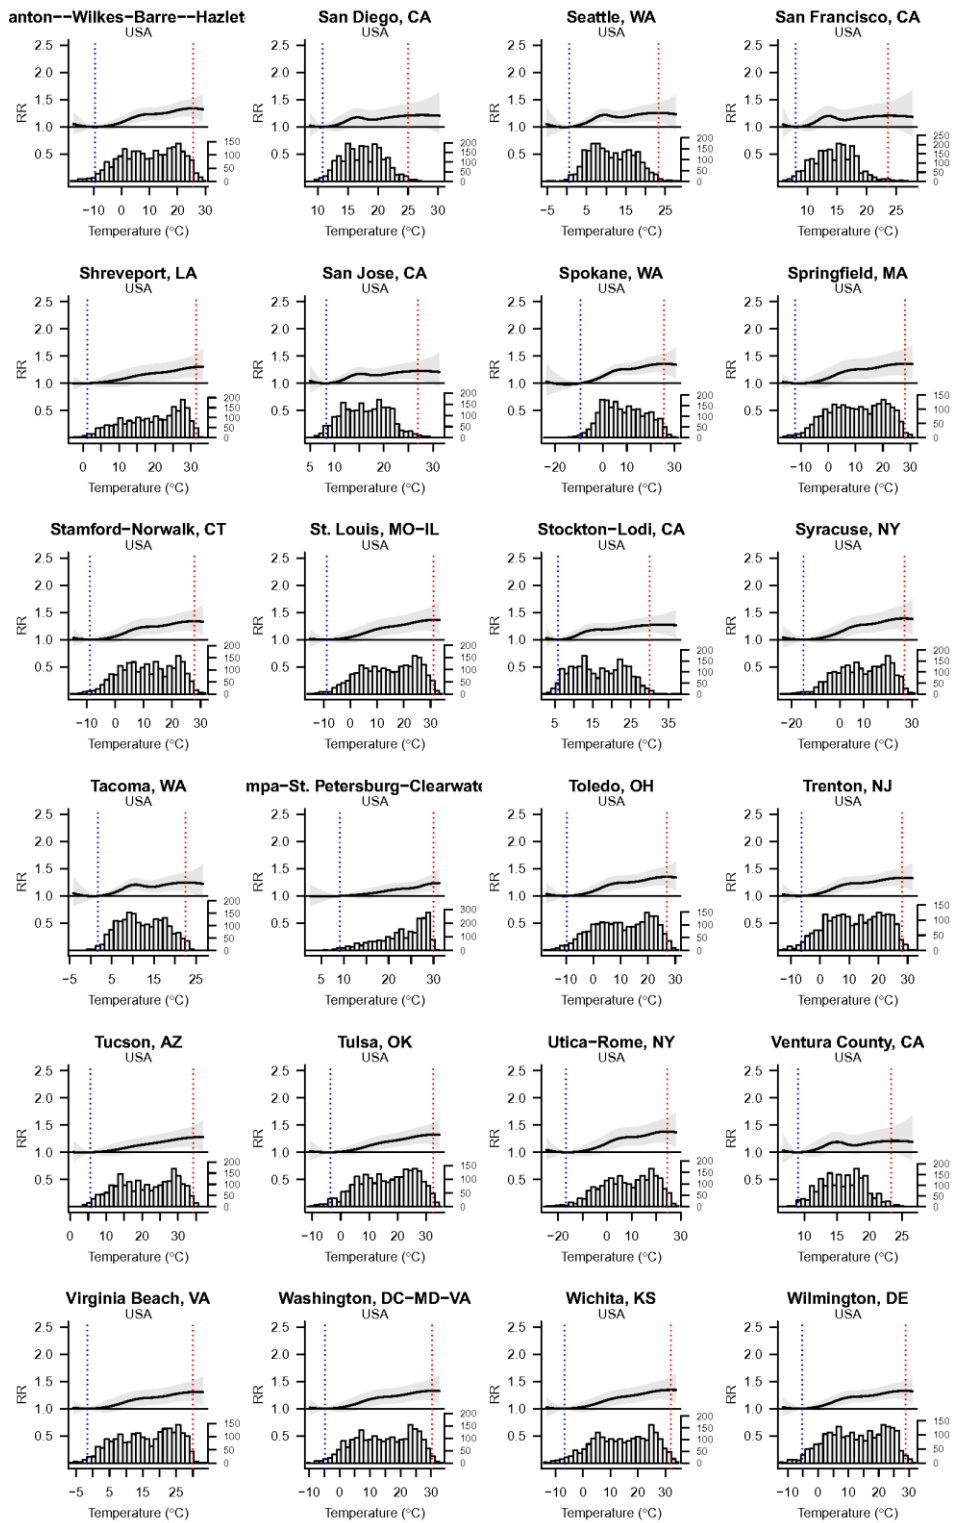

Figure S3. (Continued).

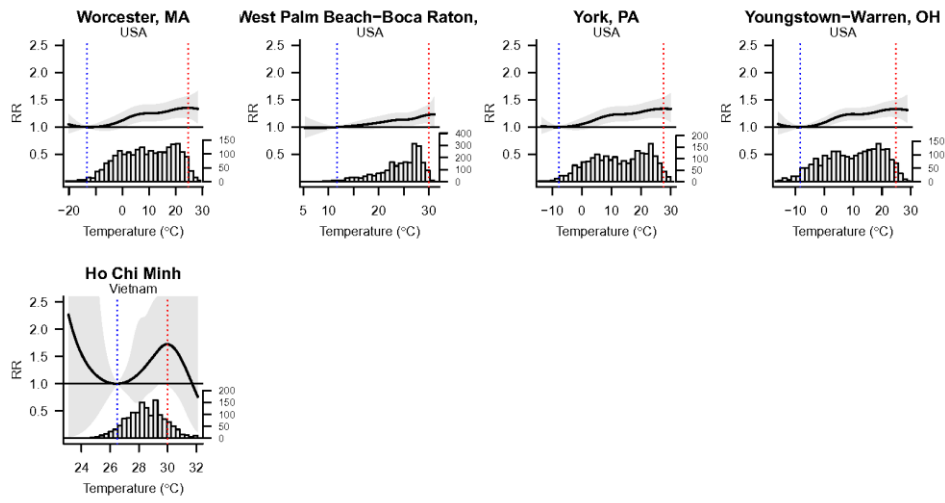

**Figure S3.** (Continued).

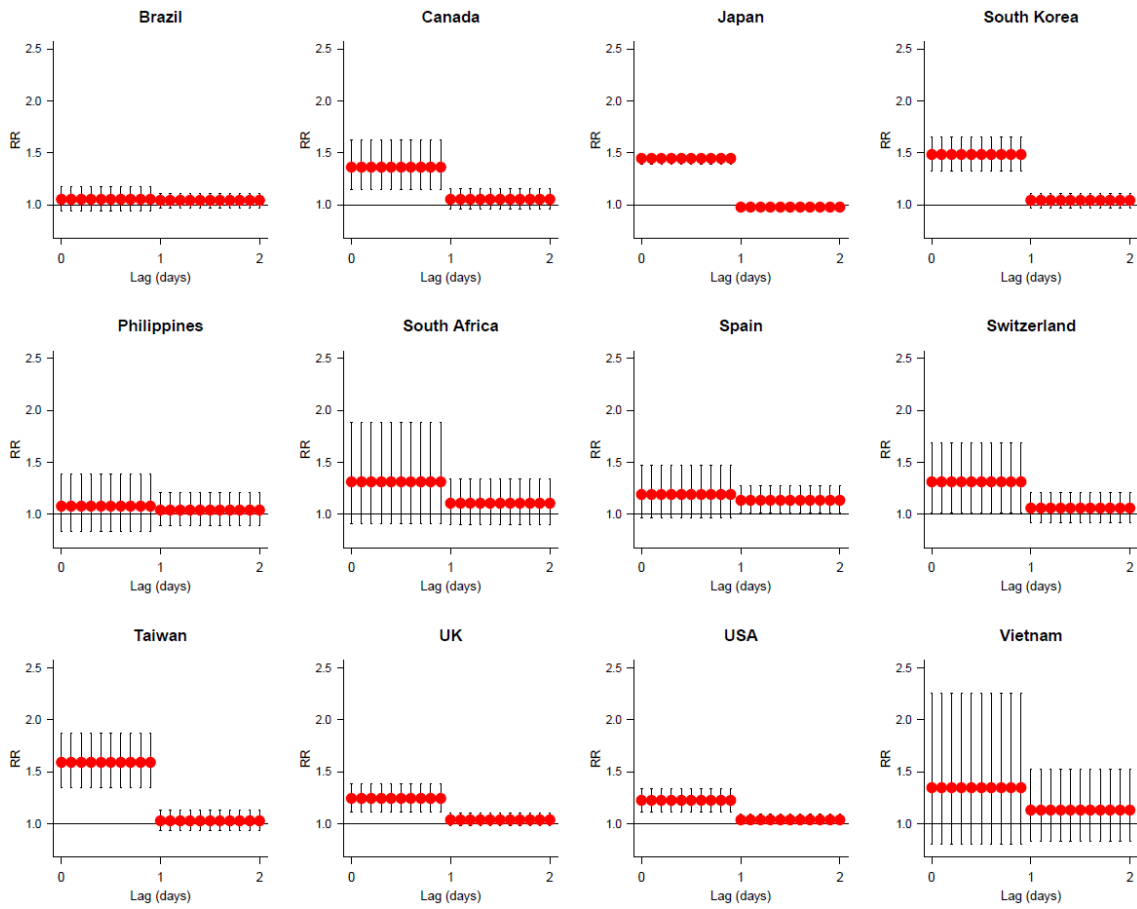

**Figure S4.** Country-specific pooled lag-response associations for the maximum suicide temperature (MaxST) vs. the minimum suicide temperature (MinST) with the 95% confidence intervals (vertical bars) using a conditional Poisson model adjusting for seasonality, long-term time trend, and the day of week. RR, relative risk.



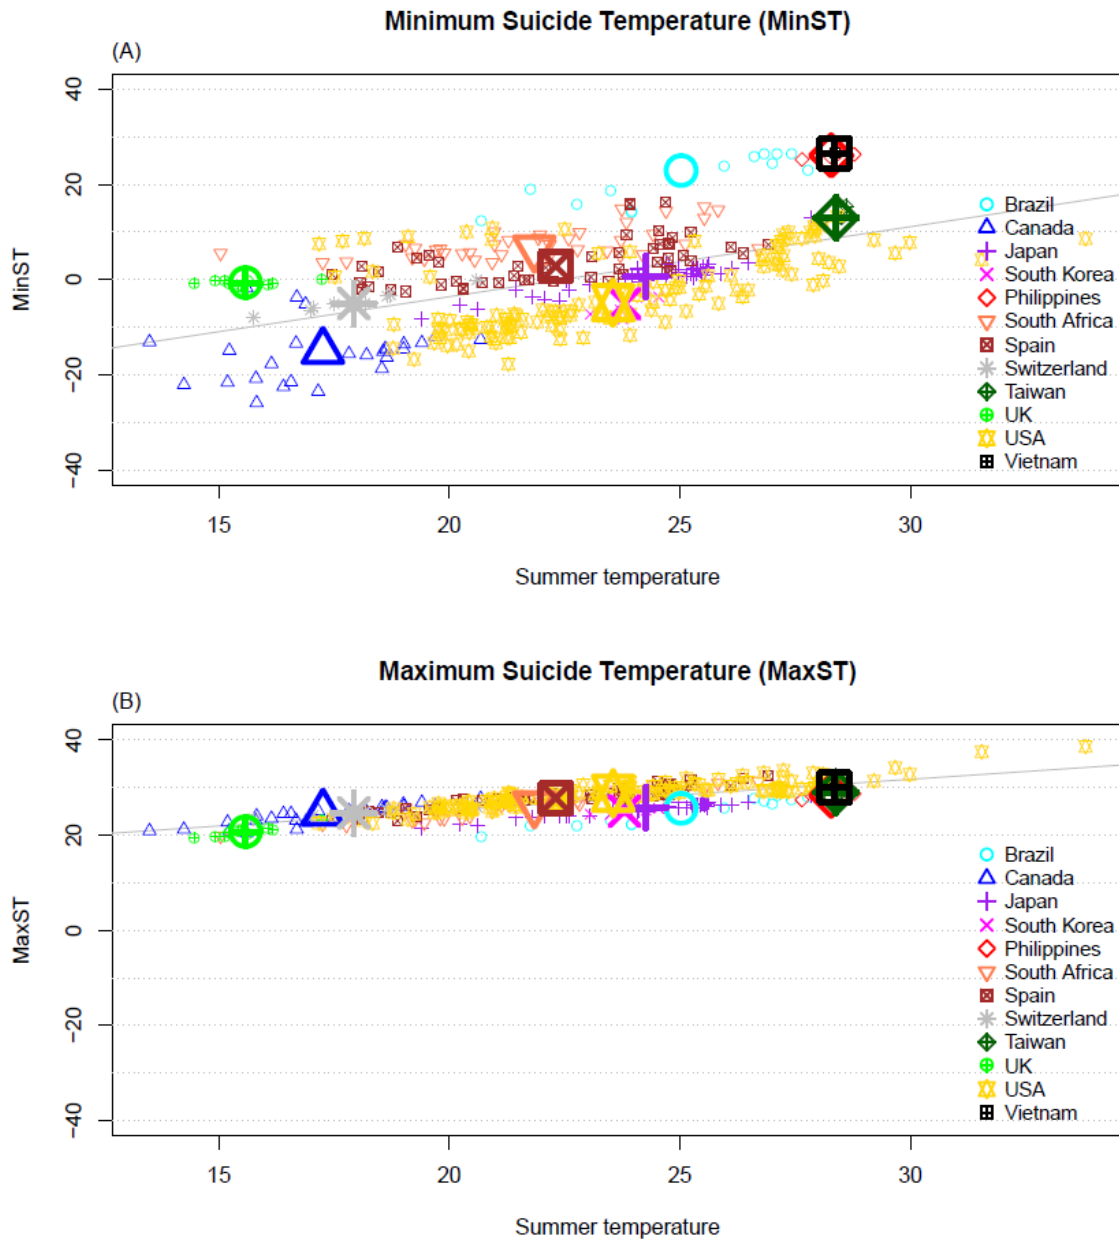

**Figure S5.** Distributions of the location-specific (A) minimum suicide temperature (°C) (MinST) and (B) maximum suicide temperature (°C) (MaxST) against summer average temperature (°C) by country. Larger symbols indicate the country-specific median values of the MinST and MaxST against the average of the summer temperature by country. The summer temperature was defined as the average of daily ambient temperature during June to September in the countries in Northern Hemisphere and during December to March in the countries in Southern Hemisphere.

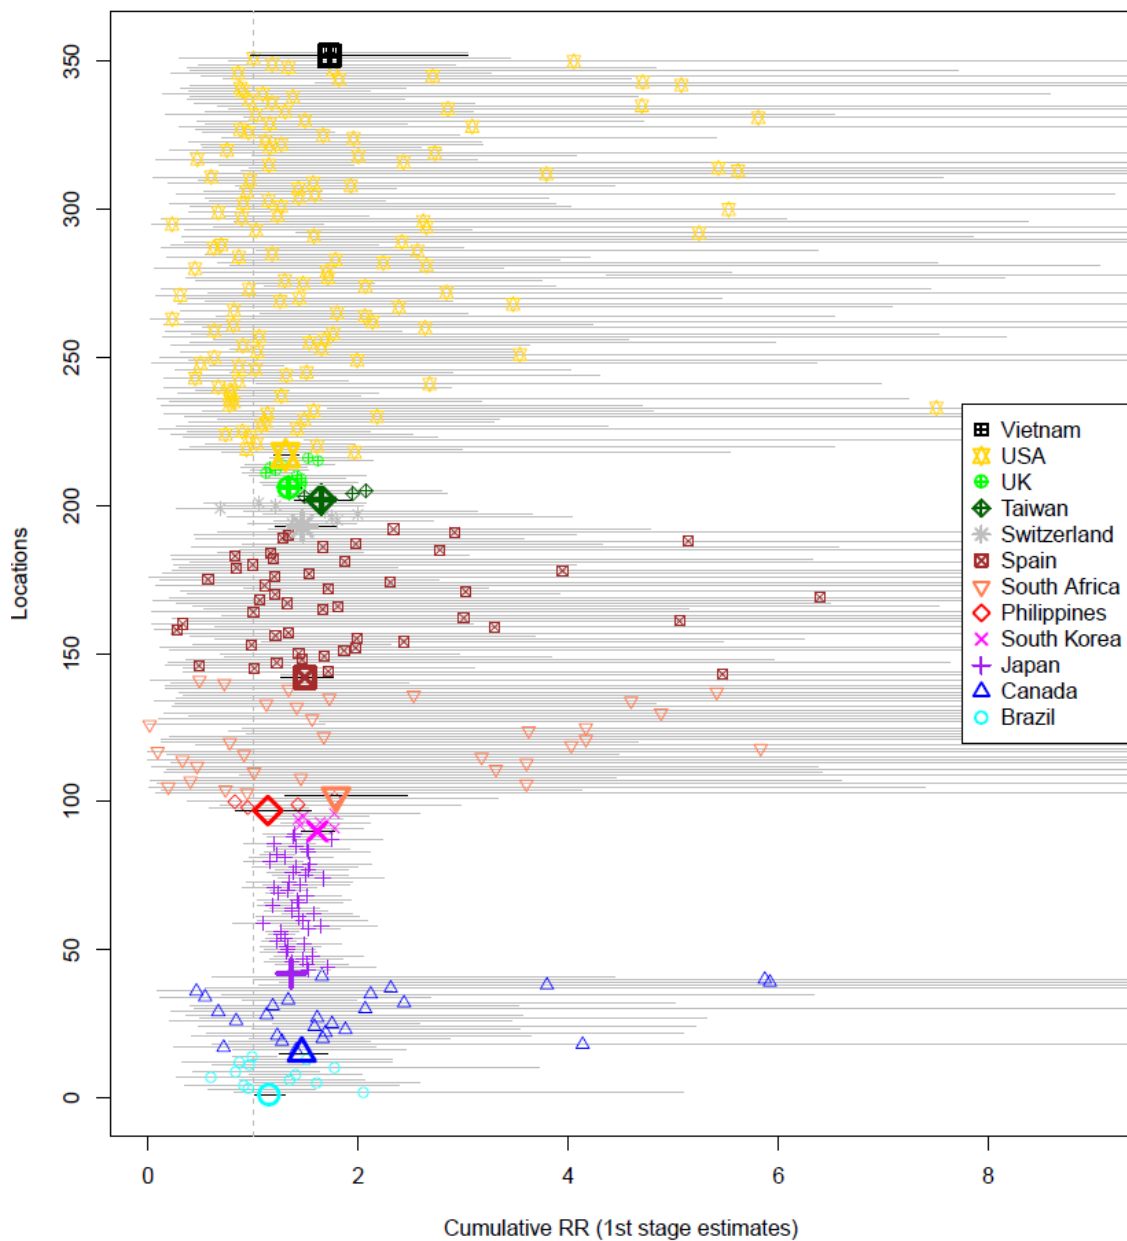

**Figure S6.** Country-specific and location-specific lag-cumulative temperature-suicide associations for maximum suicide temperature (MaxST) vs. minimum suicide temperature (MinST) using a conditional Poisson model adjusting for seasonality, long-term time trend, and the day of week. Larger symbols indicate the country-specific pooled estimates, and the location-specific estimates were derived from the first-stage modeling. The grey lines indicate the 95% confidence intervals. RR, relative risk.

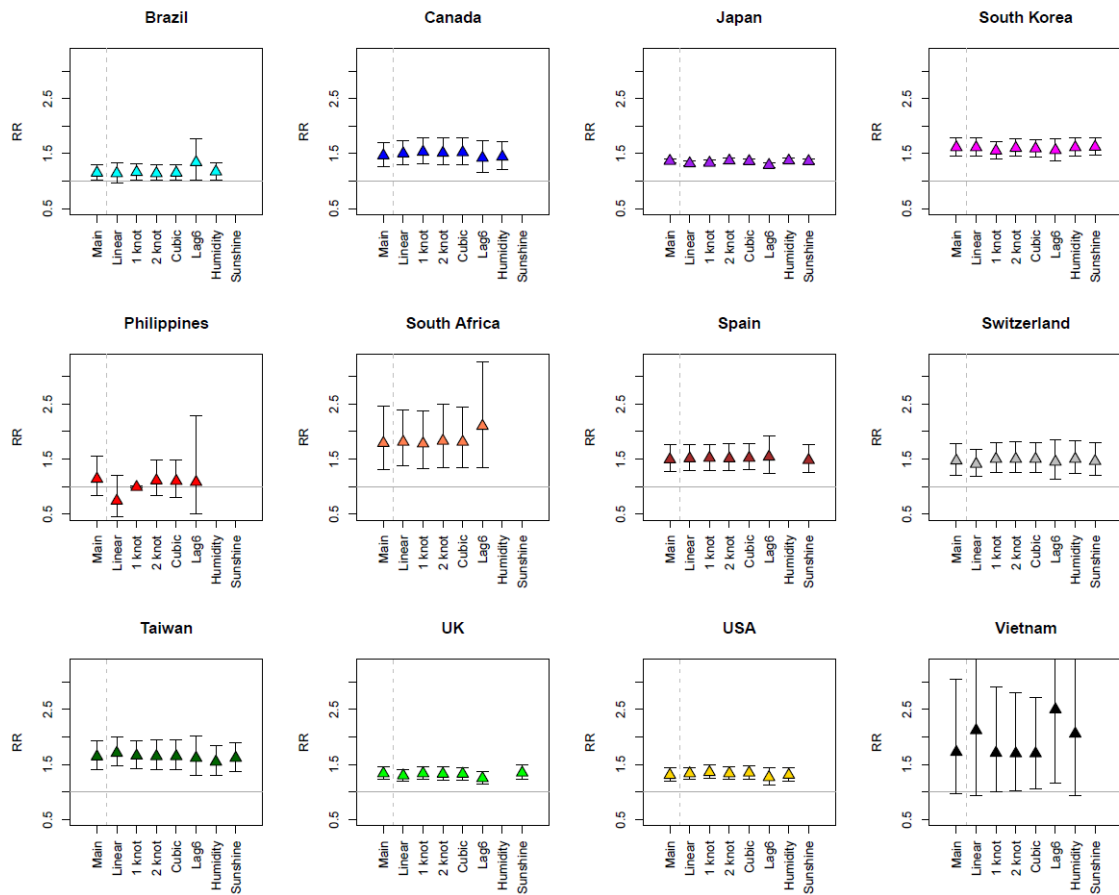

**Figure S7.** Pooled lag-cumulative relative risks (RRs) with 95% CIs (vertical bars) by country in sensitivity analyses. The main model (Main) included a quadratic B-spline with three internal knots for the temperature-suicide association over the lag of 0–2 d. A linear distributed lag model (Linear) included the same lag of 0–2 d and estimated the RR between the 1st and the 99th percentiles of mean temperature. Different parameterizations for the temperature-suicide association were applied by including one internal knot at 50th percentile (1 knot), two internal knots at 33rd and 66th percentiles (2 knot), and a cubic B-spline at the same three internal knots (Cubic). The maximum lag was extended up to 6 d (Lag6). Additional covariates such as the averages of relative humidity (Humidity) and sunshine duration (Sunshine) over the current day and a day before, respectively, were adjusted in a subset of data. The temperature-suicide associations were estimated using a conditional Poisson model adjusting for seasonality, long-term time trend, and the day of week. CI, confidence intervals.

## References

Pillay-van Wyk V, Msemburi W, Laubscher R, Dorrington RE, Groenewald P, Glass T, et al. 2016.

Mortality trends and differentials in South Africa from 1997 to 2012: second National Burden of Disease Study. *The Lancet Global Health* 4(9):e642–e653.

WHO. 2014. Preventing suicide: a global imperative. Geneva, Switzerland: WHO.
